# Supplementary material
Source: PubMed Central journal article supplement (PMC4211440)
Supplement: rspb20140604supp1.pdf [file rspb20140604supp1.pdf]

Supplementary Material – Figures and Tables

**Figure S1. Structure of ICD-10 codes used for autism (blue lines), schizophrenia (red lines) and related disorders.** For corresponding ICD-8 codes, see table S2.

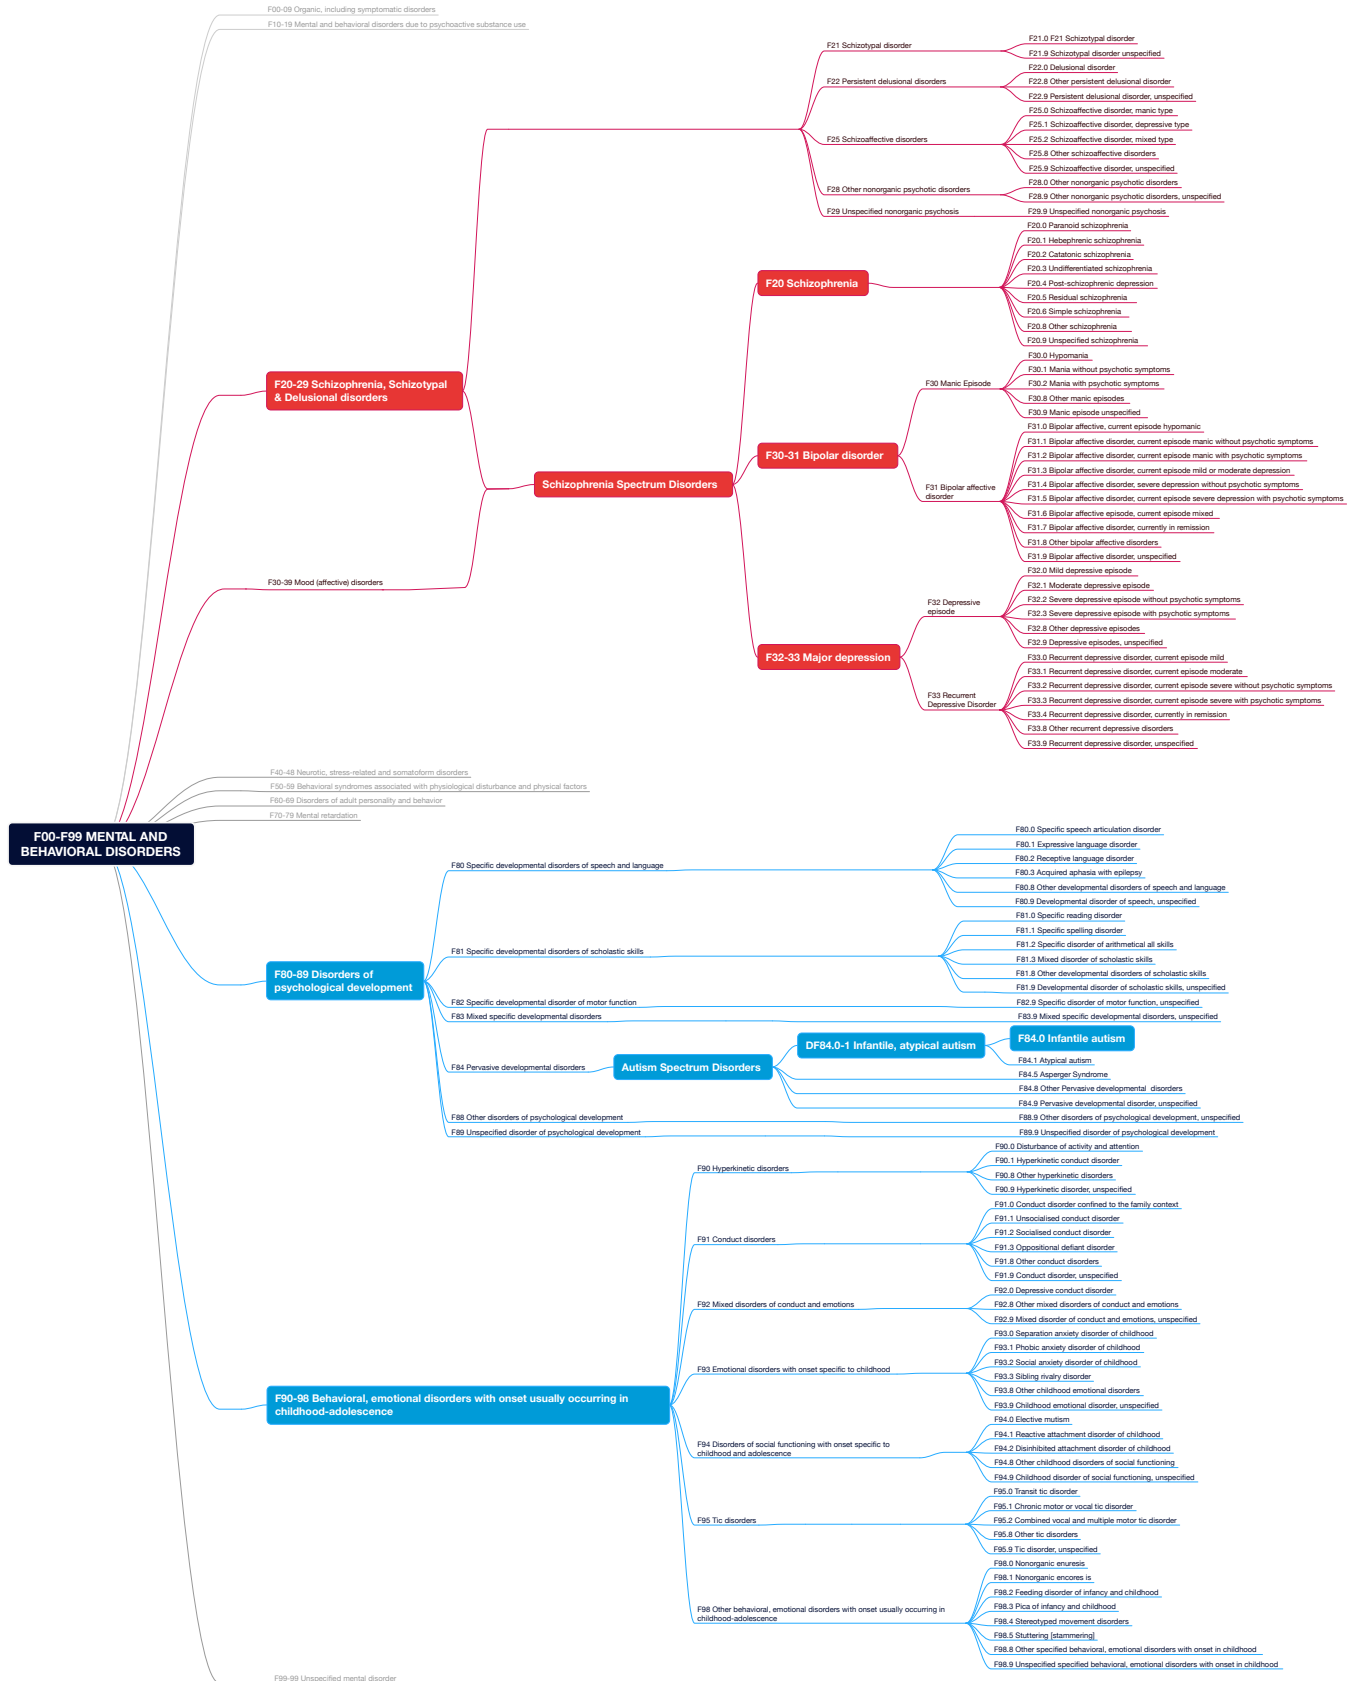

*Supplementary Material – Figures and Tables*

**Figure S2. Age at first diagnosis for autistic (A) and schizophrenic (B) disorders.** Blue lines – males; red lines – females. Autistic disorders: **AS**, autism-spectrum disorders; **AI**, autism-infantile; **A**, autism-all types; **DD**, disorders of psychological development; **BE**, behavioral and emotional disorders. Schizophrenic disorders: **SS**, schizophrenia-spectrum disorders; **S**, schizophrenia; **SD**, schizophrenia-schizotypal-delusional disorders; **B**, bipolar disorder; **MD**, major depression. Black arrows are mean age first diagnosed for all autistic (mean=10.6) and all schizophrenic (mean=21.3) disorders.

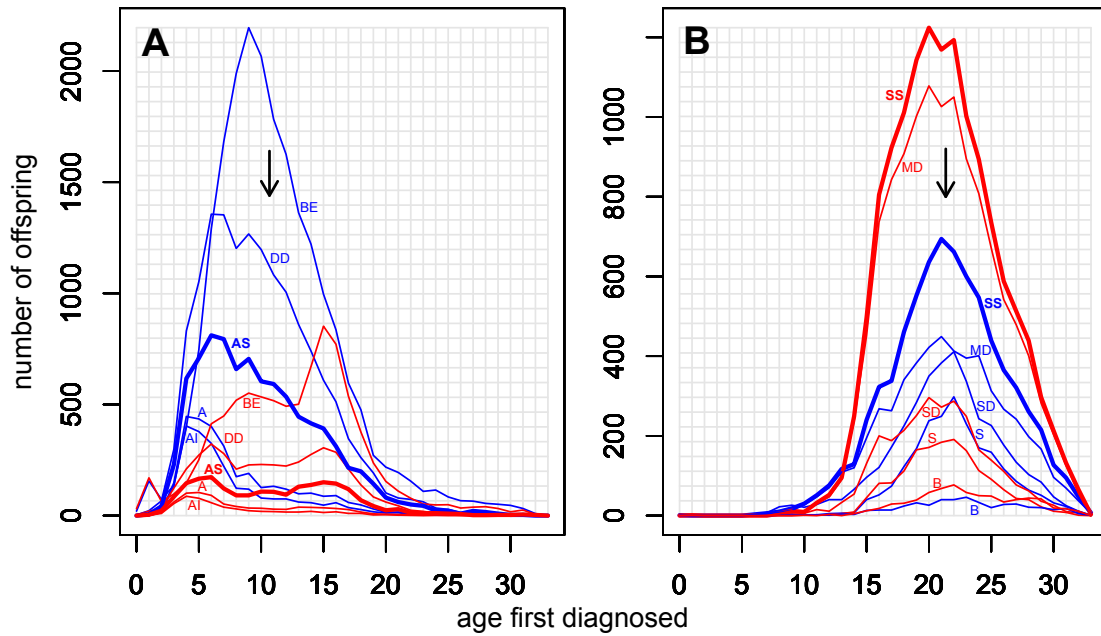

*Supplementary Material – Figures and Tables*

**Figure S3. Isoclines of risk for autism-spectrum (A) and schizophrenia-spectrum (B) disorders by birth length and gestation length.** Blue and red shades indicate decreased and increased risk for disorders, respectively. Relative risk ranges are given by color in the key and numerically on the contour lines.

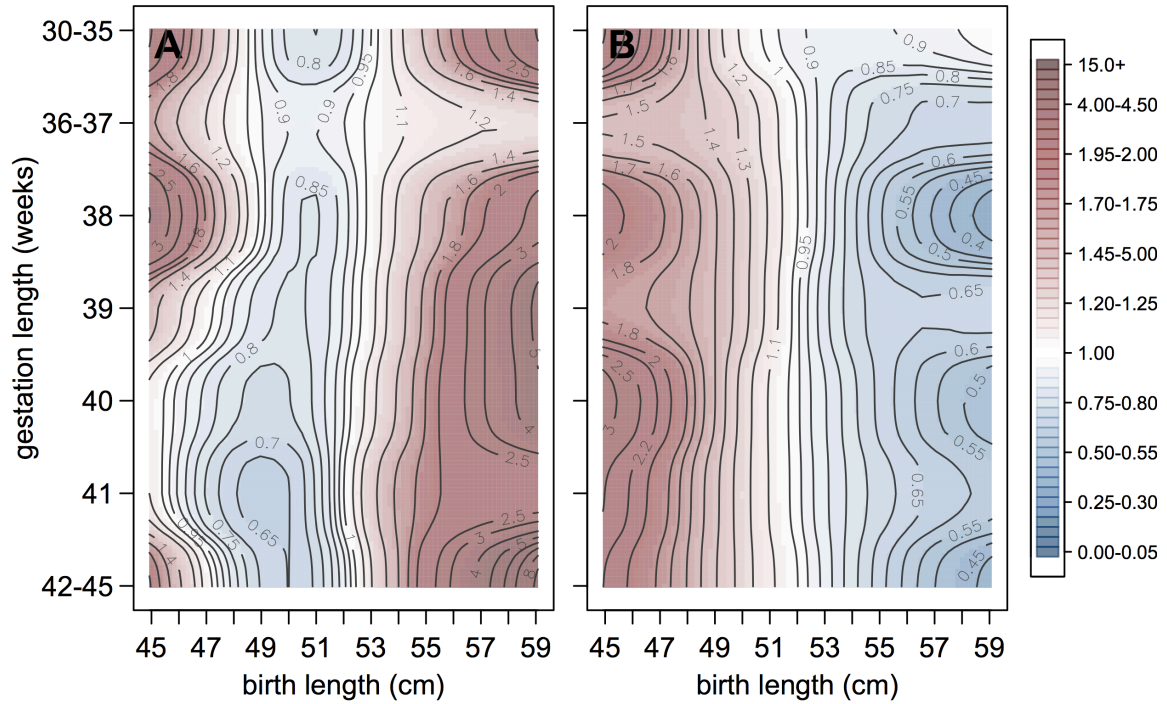

Supplementary Material – Figures and Tables

**Table S1. Study sample characteristics for autism-spectrum (AS) and schizophrenia-spectrum (SS) disorders.** Numbers (*n*), means (multiplied by 100 for binary traits so they appear as percentages) and standard deviations (in brackets) are provided. Total sample size 1,757,770; 95,345/1,662,425 were/were not diagnosed with target disorders across the study period. Absolute risks for AS and SS within the study period were 0.65% and 1.23%, respectively.

|                         | AS                                 | all                     | SS                                 | all                     |                  |
|-------------------------|------------------------------------|-------------------------|------------------------------------|-------------------------|------------------|
| offspring with disorder | <i>n</i> = 10890<br>0.6508 (0.080) | <i>n</i> = 1673315<br>- | <i>n</i> = 20672<br>1.2282 (0.110) | <i>n</i> = 1683097<br>- |                  |
| parental                | mothers with disorder              | 0.1377 (0.037)          | 0.0087 (0.009)                     | 9.1718 (0.289)          | 3.2725 (0.178)   |
|                         | fathers with disorder              | 0.2112 (0.046)          | 0.0147 (0.012)                     | 5.9307 (0.236)          | 2.2298 (0.148)   |
|                         | paternal age (yrs)                 | 31.13 (1.21)            | 30.79 (1.20)                       | 29.36 (1.21)            | 30.77 (1.20)     |
|                         | maternal age (yrs)                 | 28.19 (1.19)            | 28.14 (1.19)                       | 26.36 (1.20)            | 28.11 (1.19)     |
|                         | pre-existing hypertension          | 0.2388 (0.049)          | 0.3287 (0.057)                     | 0.1790 (0.042)          | 0.3275 (0.057)   |
|                         | pre-existing diabetes              | 0.4775 (0.069)          | 0.3866 (0.062)                     | 0.3483 (0.059)          | 0.3855 (0.062)   |
|                         | previous induced abortion          | 21.1387 (0.408)         | 18.1201 (0.385)                    | 21.5267 (0.411)         | 18.1424 (0.385)  |
|                         | previous spontaneous abortion      | 15.6657 (0.363)         | 14.2655 (0.350)                    | 16.1523 (0.368)         | 14.2796 (0.350)  |
|                         | education (combined highest, yrs)  | 25.48 (4.72)            | 25.66 (4.78)                       | 24.22 (5.00)            | 25.65 (4.78)     |
|                         | income (combined average, dkk)     | 348007 (138791)         | 363947 (173785)                    | 384117 (168980)         | 364298 (173940)  |
| pregnancy               | gestation length (weeks)           | 39.64 (1.79)            | 39.76 (1.64)                       | 39.66 (1.67)            | 39.76 (1.64)     |
|                         | maternal bleeding                  | 8.6226 (0.281)          | 7.3800 (0.261)                     | 8.6397 (0.281)          | 7.3874 (0.262)   |
|                         | fetal oxygen deprivation           | 0.0459 (0.021)          | 0.0873 (0.030)                     | 0.2467 (0.050)          | 0.0895 (0.030)   |
|                         | pregnancy oedema                   | 0.6520 (0.080)          | 0.8055 (0.089)                     | 1.4658 (0.120)          | 0.8146 (0.090)   |
|                         | gestational diabetes               | 0.2204 (0.047)          | 0.3592 (0.060)                     | 0.0000 (0.000)          | 0.3557 (0.060)   |
|                         | gestational hypertension           | 4.9495 (0.217)          | 3.7733 (0.191)                     | 4.6536 (0.211)          | 3.7766 (0.191)   |
|                         | birth                              | birth weight group (g)  | 3507.12 (486.56)                   | 3492.80 (457.03)        | 3398.90 (454.65) |
| 1 (1850 - 2490)         |                                    | 1.8365 (0.134)          | 1.2111 (0.109)                     | 1.9350 (0.138)          | 1.2159 (0.110)   |
| 2 (2491 - 2890)         |                                    | 7.8696 (0.269)          | 7.4490 (0.263)                     | 10.8311 (0.311)         | 7.4878 (0.263)   |
| 3 (2891 - 3290)         |                                    | 22.8834 (0.420)         | 24.6402 (0.431)                    | 28.5700 (0.452)         | 24.6998 (0.431)  |
| central (3291 - 3690)   |                                    | 33.9486 (0.474)         | 35.0046 (0.477)                    | 34.0074 (0.474)         | 34.9992 (0.477)  |
| 4 (3691 - 4090)         |                                    | 22.1947 (0.416)         | 22.2031 (0.416)                    | 17.9712 (0.384)         | 22.1511 (0.415)  |
| 5 (4091 - 4490)         |                                    | 8.5216 (0.279)          | 7.4921 (0.263)                     | 5.4325 (0.227)          | 7.4602 (0.263)   |
| 6 (4491 - 5400)         |                                    | 2.7456 (0.163)          | 1.9999 (0.140)                     | 1.2529 (0.111)          | 1.9859 (0.140)   |
| birth length group (cm) |                                    | 52.06 (2.14)            | 51.87 (2.02)                       | 51.45 (2.03)            | 51.87 (2.02)     |
| 1 (45 - 48.0)           |                                    | 2.9657 (0.170)          | 2.7147 (0.163)                     | 4.2843 (0.203)          | 2.7323 (0.163)   |
| 2 (48.1 - 49.6)         |                                    | 8.5696 (0.280)          | 9.1889 (0.289)                     | 11.6667 (0.321)         | 9.2233 (0.289)   |
| 3 (49.7 - 51.2)         |                                    | 23.3511 (0.423)         | 26.3132 (0.440)                    | 31.2598 (0.464)         | 26.3928 (0.441)  |
| central (51.3 - 52.7)   |                                    | 30.1151 (0.459)         | 31.2895 (0.464)                    | 29.9608 (0.458)         | 31.2807 (0.464)  |
| 4 (52.8 - 54.3)         |                                    | 20.0954 (0.401)         | 18.8623 (0.391)                    | 14.3382 (0.350)         | 18.7990 (0.391)  |
| 5 (54.4 - 55.9)         |                                    | 11.2546 (0.316)         | 9.1308 (0.288)                     | 6.8137 (0.252)          | 9.0888 (0.287)   |
| 6 (56.0 - 59)           |                                    | 3.6486 (0.188)          | 2.5006 (0.156)                     | 1.6765 (0.128)          | 2.4831 (0.156)   |
| APGAR 5 score (1-10)    |                                    | 9.81 (0.82)             | 9.88 (0.62)                        | 9.88 (0.61)             | 9.88 (0.62)      |
| other                   | sex (0=male, 1=female)             | 19.5041 (0.396)         | 48.4654 (0.500)                    | 64.3431 (0.479)         | 48.8477 (0.500)  |
|                         | birth year                         | 1994.00 (5.97)          | 1994.17 (8.59)                     | 1984.82 (4.50)          | 1994.06 (8.63)   |
|                         | birth season (calendar month)      | 6.51 (3.38)             | 6.48 (3.37)                        | 6.40 (3.39)             | 6.48 (3.37)      |
|                         | country (0=native, 1=non-native)   | 5.3903 (0.226)          | 6.9850 (0.255)                     | 2.6026 (0.159)          | 6.9415 (0.254)   |
|                         | demographic parity                 |                         |                                    |                         |                  |
|                         | first                              | 50.1194 (0.500)         | 44.2131 (0.497)                    | 45.3512 (0.498)         | 44.1889 (0.497)  |
|                         | second                             | 33.9210 (0.473)         | 37.3878 (0.484)                    | 36.3971 (0.481)         | 37.3980 (0.484)  |
|                         | third                              | 11.9376 (0.324)         | 13.7339 (0.344)                    | 13.4868 (0.342)         | 13.7425 (0.344)  |
|                         | fourth (or higher)                 | 4.0220 (0.196)          | 4.6652 (0.211)                     | 4.7649 (0.213)          | 4.6706 (0.211)   |
|                         | region most lived                  |                         |                                    |                         |                  |
|                         | Hovedstaden                        | 36.2810 (0.481)         | 28.5040 (0.451)                    | 27.5058 (0.447)         | 28.4414 (0.451)  |
|                         | Sjælland                           | 13.0395 (0.337)         | 14.7481 (0.355)                    | 13.1821 (0.338)         | 14.7399 (0.355)  |
|                         | Syddanmark                         | 18.2002 (0.386)         | 22.2330 (0.416)                    | 24.9420 (0.433)         | 22.2924 (0.416)  |
|                         | Midtjylland                        | 23.6639 (0.425)         | 23.6836 (0.425)                    | 26.5190 (0.441)         | 23.7186 (0.425)  |
|                         | Nordjylland                        | 8.8154 (0.284)          | 10.8313 (0.311)                    | 7.8512 (0.269)          | 10.8078 (0.310)  |

*Supplementary Material – Figures and Tables*

**Table S2. ICD-8 and ICD-10 classification codes used for autism, schizophrenia and related disorders.**

| <b>AUTISTIC</b>                                                                                                                                            |                                                                                                                                                                                                                                                                                                                                                                                                                                                                                                                                                                                                          |
|------------------------------------------------------------------------------------------------------------------------------------------------------------|----------------------------------------------------------------------------------------------------------------------------------------------------------------------------------------------------------------------------------------------------------------------------------------------------------------------------------------------------------------------------------------------------------------------------------------------------------------------------------------------------------------------------------------------------------------------------------------------------------|
| <b>autism - infantile</b>                                                                                                                                  | <b>ICD-8:</b> 299.00                                                                                                                                                                                                                                                                                                                                                                                                                                                                                                                                                                                     |
|                                                                                                                                                            | <b>ICD10:</b> F84.0                                                                                                                                                                                                                                                                                                                                                                                                                                                                                                                                                                                      |
| <b>autism - all types (infantile and atypical autism)</b>                                                                                                  | <b>ICD-8:</b> 299.00, 299.01                                                                                                                                                                                                                                                                                                                                                                                                                                                                                                                                                                             |
|                                                                                                                                                            | <b>ICD10:</b> F84.0, F84.1, F84.10, F84.11, F84.12                                                                                                                                                                                                                                                                                                                                                                                                                                                                                                                                                       |
| <b>autism-spectrum disorders – infantile and atypical autism, Asperger's syndrome, pervasive developmental disorder, not otherwise specified (PDD-NOS)</b> | <b>ICD-8:</b> 299.00, 299.01, 299.02, 299.03                                                                                                                                                                                                                                                                                                                                                                                                                                                                                                                                                             |
|                                                                                                                                                            | <b>ICD10:</b> F84.0, F84.1, F84.10, F84.11, F84.12, F84.5, F84.8, F84.9                                                                                                                                                                                                                                                                                                                                                                                                                                                                                                                                  |
| <b>disorders of psychological development</b>                                                                                                              | <b>ICD-8:</b> 299.00, 299.01, 299.02, 299.03, 306.09, 306.10, 306.11, 306.12, 306.18, 306.19, 306.39                                                                                                                                                                                                                                                                                                                                                                                                                                                                                                     |
|                                                                                                                                                            | <b>ICD10:</b> F80, F80.0, F80.1, F80.2, F80.3, F80.8, F80.9, F81.0, F81.1, F81.2, F81.3, F81.8, F81.9, F82, F82.9, F83, F83.9, F84, F84.0, F84.1, F84.10, F84.11, F84.12, F84.2, F84.3, F84.4, F84.5, F84.8, F84.9, F88, F88.9, F89, F89.9                                                                                                                                                                                                                                                                                                                                                               |
| <b>behavioral and emotional disorders with onset in childhood and adolescence</b>                                                                          | <b>ICD-8:</b> 308.00, 308.01, 308.02, 308.03, 308.04, 308.05, 308.06, 308.07, 308.09, 306.29, 306.49, 306.50, 306.58, 306.59                                                                                                                                                                                                                                                                                                                                                                                                                                                                             |
|                                                                                                                                                            | <b>ICD10:</b> F90, F90.0, F90.1, F90.8, F90.9, F91, F91.0, F91.1, F91.2, F91.3, F91.8, F91.9, F92, F92.0, F92.8, F92.9, F93, F93.0, F93.1, F93.2, F93.3, F93.8, F93.80, F93.9, F94, F94.0, F94.1, F94.2, F94.8, F94.9, F95.0, F95.1, F95.2, F95.8, F95.9, F98, F98.0, F98.00, F98.01, F98.02, F98.1, F98.10, F98.11, F98.12, F98.2, F98.3, F98.4, F98.40, F98.41, F98.42, F98.5, F98.8, F98.8C, F98.9                                                                                                                                                                                                    |
| <b>SCHIZOPHRENIC</b>                                                                                                                                       |                                                                                                                                                                                                                                                                                                                                                                                                                                                                                                                                                                                                          |
| <b>schizophrenia</b>                                                                                                                                       | <b>ICD-8:</b> 295.09, 295.19, 295.29, 295.39, 295.59, 295.69, 295.89, 295.99                                                                                                                                                                                                                                                                                                                                                                                                                                                                                                                             |
|                                                                                                                                                            | <b>ICD10:</b> F20, F20.0, F20.00, F20.01, F20.02, F20.03, F20.04, F20.05, F20.06, F20.07, F20.08, F20.09, F20.1, F20.10, F20.11, F20.12, F20.13, F20.14, F20.15, F20.18, F20.19, F20.2, F20.20, F20.21, F20.22, F20.23, F20.24, F20.25, F20.28, F20.29, F20.3, F20.30, F20.31, F20.32, F20.33, F20.34, F20.35, F20.38, F20.39, F20.4, F20.40, F20.44, F20.5, F20.50, F20.51, F20.52, F20.53, F20.54, F20.55, F20.58, F20.59, F20.6, F20.60, F20.61, F20.62, F20.63, F20.64, F20.65, F20.69, F20.8, F20.80, F20.81, F20.84, F20.88, F20.9, F20.90, F20.91, F20.92, F20.93, F20.94, F20.95, F20.98, F20.99 |
| <b>bipolar disorder</b>                                                                                                                                    | <b>ICD-8:</b> 296.19, 296.39                                                                                                                                                                                                                                                                                                                                                                                                                                                                                                                                                                             |
|                                                                                                                                                            | <b>ICD10:</b> F30, F30.0, F30.1, F30.2, F30.20, F30.21, F30.8, F30.9, F31, F31.0, F31.1, F31.2, F31.20, F31.21, F31.3, F31.30, F31.31, F31.4, F31.5, F31.50, F31.51, F31.6, F31.7, F31.8, F31.9                                                                                                                                                                                                                                                                                                                                                                                                          |
| <b>major depression</b>                                                                                                                                    | <b>ICD-8:</b> 296.09, 296.29, 296.99, 298.09, 300.49                                                                                                                                                                                                                                                                                                                                                                                                                                                                                                                                                     |
|                                                                                                                                                            | <b>ICD10:</b> F32, F32.0, F32.00, F32.01, F32.1, F32.10, F32.11, F32.2, F32.3, F32.30, F32.31, F32.8, F32.9, F32.9A, F33, F33.0,                                                                                                                                                                                                                                                                                                                                                                                                                                                                         |

## Supplementary Material – Figures and Tables

|                                                                                       |               |                                                                                                                                                                                                                                                                                                                                                                                                                                                                                                                                                                                                                                                                                                                                                                                                                                                                                                                                                                                                    |
|---------------------------------------------------------------------------------------|---------------|----------------------------------------------------------------------------------------------------------------------------------------------------------------------------------------------------------------------------------------------------------------------------------------------------------------------------------------------------------------------------------------------------------------------------------------------------------------------------------------------------------------------------------------------------------------------------------------------------------------------------------------------------------------------------------------------------------------------------------------------------------------------------------------------------------------------------------------------------------------------------------------------------------------------------------------------------------------------------------------------------|
|                                                                                       |               | F33.00, F33.01, F33.1, F33.10, F33.11, F33.2, F33.21, F33.3, F33.30, F33.31, F33.4, F33.8, F33.9                                                                                                                                                                                                                                                                                                                                                                                                                                                                                                                                                                                                                                                                                                                                                                                                                                                                                                   |
| <b>schizophrenic-spectrum disorders -</b><br>schizophrenia, bipolar, major depression | <b>ICD-8:</b> | 295.09, 295.19, 295.29, 295.39, 295.59, 295.69, 295.89, 295.99, 296.19, 296.39, 296.09, 296.29, 296.99, 298.09, 300.49                                                                                                                                                                                                                                                                                                                                                                                                                                                                                                                                                                                                                                                                                                                                                                                                                                                                             |
|                                                                                       | <b>ICD10:</b> | F20, F20.0, F20.00, F20.01, F20.02, F20.03, F20.04, F20.05, F20.06, F20.07, F20.08, F20.09, F20.1, F20.10, F20.11, F20.12, F20.13, F20.14, F20.15, F20.18, F20.19, F20.2, F20.20, F20.21, F20.22, F20.23, F20.24, F20.25, F20.28, F20.29, F20.3, F20.30, F20.31, F20.32, F20.33, F20.34, F20.35, F20.38, F20.39, F20.4, F20.40, F20.44, F20.5, F20.50, F20.51, F20.52, F20.53, F20.54, F20.55, F20.58, F20.59, F20.6, F20.60, F20.61, F20.62, F20.63, F20.64, F20.65, F20.69, F20.8, F20.80, F20.81, F20.84, F20.88, F20.9, F20.90, F20.91, F20.92, F20.93, F20.94, F20.95, F20.98, F20.99, F30, F30.0, F30.1, F30.2, F30.20, F30.21, F30.8, F30.9, F31, F31.0, F31.1, F31.2, F31.20, F31.21, F31.3, F31.30, F31.31, F31.4, F31.5, F31.50, F31.51, F31.6, F31.7, F31.8, F31.9, F32, F32.0, F32.00, F32.01, F32.1, F32.10, F32.11, F32.2, F32.3, F32.30, F32.31, F32.8, F32.9, F32.9A, F33, F33.0, F33.00, F33.01, F33.1, F33.10, F33.11, F33.2, F33.21, F33.3, F33.30, F33.31, F33.4, F33.8, F33.9 |
| <b>schizophrenia-schizotypal-delusional disorders</b>                                 | <b>ICD-8:</b> | 295.09, 295.19, 295.29, 295.39, 295.59, 295.69, 295.89, 295.99, 297.09, 297.19, 297.99, 298.39, 296.89, 301.83                                                                                                                                                                                                                                                                                                                                                                                                                                                                                                                                                                                                                                                                                                                                                                                                                                                                                     |
|                                                                                       | <b>ICD10:</b> | F20, F20.0, F20.00, F20.01, F20.02, F20.03, F20.04, F20.05, F20.06, F20.07, F20.08, F20.09, F20.1, F20.10, F20.11, F20.12, F20.13, F20.14, F20.15, F20.18, F20.19, F20.2, F20.20, F20.21, F20.22, F20.23, F20.24, F20.25, F20.28, F20.29, F20.3, F20.30, F20.31, F20.32, F20.33, F20.34, F20.35, F20.38, F20.39, F20.4, F20.40, F20.44, F20.5, F20.50, F20.51, F20.52, F20.53, F20.54, F20.55, F20.58, F20.59, F20.6, F20.60, F20.61, F20.62, F20.63, F20.64, F20.65, F20.69, F20.8, F20.80, F20.81, F20.84, F20.88, F20.9, F20.90, F20.91, F20.92, F20.93, F20.94, F20.95, F20.98, F20.99, F21, F21.0, F21.00, F21.9, F22, F22.0, F22.00, F22.2, F22.8, F22.9, F25, F25.0, F25.00, F25.01, F25.1, F25.10, F25.11, F25.2, F25.20, F25.21, F25.8, F25.80, F25.81, F25.9, F25.90, F25.91, F28, F28.0, F28.9, F29, F29.9                                                                                                                                                                              |

*Supplementary Material – Figures and Tables*

**Table S3. ICD-8 and ICD-10 classification codes used for covariates.**

| <b>PRE-EXISTING CONDITIONS</b>                                                                                                                                                                     |               |                                                                                                                                                                                                                                                                                                                   |
|----------------------------------------------------------------------------------------------------------------------------------------------------------------------------------------------------|---------------|-------------------------------------------------------------------------------------------------------------------------------------------------------------------------------------------------------------------------------------------------------------------------------------------------------------------|
| <b>pre-existing maternal hypertension</b> – essential (primary) hypertension, hypertensive heart disease, hypertensive renal disease, hypertensive heart and renal disease, secondary hypertension | <b>ICD-8:</b> | 400.09, 400.19, 400.29, 400.39, 400.99, 401.99, 402.99, 403.99, 404.99                                                                                                                                                                                                                                            |
|                                                                                                                                                                                                    | <b>ICD10:</b> | O10, O10.0, O10.0A-0C, O10.1, O10.1A-1C, O10.2, O10.2A-2C, O10.3, O10.3A, O10.4, O10.4A-4C, O10.9, O10.9A-9C, O11, O11.9, O11.9A-9C, I10, I10.9, I11, I11.0, I11.9, I12, I12.0, I12.9, I13, I13.0-2, I13.9, I15, I15.0-2, I15.8-9                                                                                 |
| <b>pre-existing maternal diabetes</b> – type I (insulin dependent) and type II (non-insulin dependent), malnutrition-related, other, unspecified                                                   | <b>ICD-8:</b> | 249.00-09, 250.00-09                                                                                                                                                                                                                                                                                              |
|                                                                                                                                                                                                    | <b>ICD10:</b> | E10, E10.0, E10.0A-0F, E10.1-5, E10.5A-5D, E10.6-9, E10.9A, E11, E11.0, E11.0A-0E, E11.1-5, E11.5A-5D, E11.6-9, E11.9A, E12, E12.0, E12.0A-0E, E12.1-5, E12.5A-5C, E12.6-9, E13, E13.0-9, E14, E14.0, E14.0A-0D, E14.1-5, E14.5A-5D, E14.6-9, O24.0, O24.0A-0C, O24.1, O24.1A-1C, O24.2, O24.2A, O24.3, O24.3A-3B |
| <b>PREGNANCY-INDUCED</b>                                                                                                                                                                           |               |                                                                                                                                                                                                                                                                                                                   |
| <b>maternal bleeding</b> – haemorrhage in early pregnancy, placenta praevia, premature separation of placenta, antepartum haemorrhage                                                              | <b>ICD-8:</b> | 632.09, 632.19, 632.29, 632.39, 632.49, 632.99, 651.00-22, 651.24-43, 651.45-60, 651.63, 651.65-66, 651.68-80, 651.82, 651.85-87, 651.89-99                                                                                                                                                                       |
|                                                                                                                                                                                                    | <b>ICD10:</b> | O20, O20.0, O20.8, O20.8A, O20.8B, O20.9, O44, O44.0-3, O44.9, O45, O45.0, O45.0D, O45.1, O45.1B, O45.2-3, O45.8-9, O46, O46.0, O46.8, O46.8A, O46.9                                                                                                                                                              |
| <b>fetal oxygen deprivation</b> – intrauterine hypoxia, birth asphyxia                                                                                                                             | <b>ICD-8:</b> | 776.39, 776.49, 776.90-93, 776.98-99                                                                                                                                                                                                                                                                              |
|                                                                                                                                                                                                    | <b>ICD10:</b> | P20, P20.0, P20.0A-0E, P20.1, P20.1A-1B, P20.1D-1E, P20.9, P21, P21.0, P21.0A-0D, P21.1, P21.1A-1D, P21.9                                                                                                                                                                                                         |
| <b>pregnancy oedema</b>                                                                                                                                                                            | <b>ICD-8:</b> | 637.02                                                                                                                                                                                                                                                                                                            |
|                                                                                                                                                                                                    | <b>ICD10:</b> | O12, O12.0-2                                                                                                                                                                                                                                                                                                      |
| <b>gestational diabetes</b>                                                                                                                                                                        | <b>ICD10:</b> | O24.4D                                                                                                                                                                                                                                                                                                            |
| <b>gestational hypertension</b> – pregnancy-induced hypertension, preeclampsia, eclampsia                                                                                                          | <b>ICD-8:</b> | 637.00, 637.03, 637.04, 637.09, 637.19                                                                                                                                                                                                                                                                            |
|                                                                                                                                                                                                    | <b>ICD10:</b> | O13, O13.9, O14, O14.0, O14.1, O14.2, O14.9, O15, O15.0, O15.1, O15.2, O15.9                                                                                                                                                                                                                                      |

*Supplementary Material – Figures and Tables*

**Table S4. Summary of relative risks for autism-spectrum and schizophrenia-spectrum disorders depending on birth weight and birth length.** Coefficients were obtained from Cox regressions that were adjusted for socioeconomic, environmental and familial risk factors (see tables S5-S14 below for full outputs). Disorders were defined by the International Classification of Diseases ICD-8 and ICD-10 codes (see table S2). Values in **bold** indicate *P*-values < 0.05 after Bonferroni correction.

| <b>birth weight</b>                    | <b>group (g)</b>       |                        |                        |                        |                        |                        |
|----------------------------------------|------------------------|------------------------|------------------------|------------------------|------------------------|------------------------|
|                                        | <b>1</b> (1850-2490)   | <b>2</b> (2491-2890)   | <b>3</b> (2891-3290)   | <b>4</b> (3691-4090)   | <b>5</b> (4091-4490)   | <b>6</b> (4491-5400)   |
| autism-spectrum disorders              | <b>1.39(1.20-1.60)</b> | 1.01(0.93-1.08)        | <b>0.92(0.87-0.97)</b> | <b>1.06(1.01-1.11)</b> | <b>1.23(1.14-1.32)</b> | <b>1.53(1.36-1.72)</b> |
| schizophrenia-spectrum disorders       | <b>1.25(1.12-1.38)</b> | <b>1.21(1.15-1.26)</b> | <b>1.08(1.04-1.12)</b> | <b>0.94(0.90-0.98)</b> | 0.95(0.88-1.00)        | 0.90(0.79-1.02)        |
| autism-infantile                       | <b>1.83(1.42-2.25)</b> | 1.04(0.89-1.20)        | 0.94(0.85-1.03)        | 1.05(0.95-1.16)        | <b>1.20(1.04-1.38)</b> | <b>1.45(1.15-1.83)</b> |
| autism-all types                       | <b>1.65(1.32-2.06)</b> | 1.05(0.92-1.18)        | 0.94(0.85-1.01)        | 1.05(0.96-1.14)        | <b>1.17(1.03-1.31)</b> | <b>1.50(1.23-1.82)</b> |
| disorders of psychological development | <b>1.56(1.40-1.73)</b> | <b>1.10(1.04-1.16)</b> | <b>0.96(0.92-0.99)</b> | <b>1.06(1.02-1.10)</b> | <b>1.17(1.10-1.23)</b> | <b>1.47(1.33-1.60)</b> |
| behavioral and emotional disorders     | <b>1.63(1.50-1.76)</b> | <b>1.21(1.16-1.26)</b> | <b>1.03(1.00-1.06)</b> | 0.98(0.94-1.01)        | 1.02(0.97-1.07)        | <b>1.23(1.13-1.33)</b> |
| schizophrenia                          | <b>1.36(1.08-1.70)</b> | <b>1.31(1.17-1.45)</b> | 1.05(0.96-1.13)        | 1.01(0.92-1.10)        | 0.96(0.83-1.11)        | 0.98(0.73-1.29)        |
| schizophrenia-schizotypal-delusional   | <b>1.56(1.32-1.83)</b> | <b>1.23(1.13-1.34)</b> | 1.05(0.98-1.11)        | 0.97(0.90-1.03)        | 0.96(0.85-1.07)        | 0.99(0.80-1.22)        |
| bipolar disorder                       | 1.21(0.78-1.85)        | 1.04(0.83-1.28)        | 1.09(0.94-1.25)        | 1.06(0.90-1.24)        | 0.95(0.72-1.24)        | 0.84(0.48-1.45)        |
| major depression                       | <b>1.24(1.11-1.38)</b> | <b>1.18(1.12-1.24)</b> | <b>1.09(1.04-1.13)</b> | <b>0.93(0.89-0.97)</b> | <b>0.93(0.87-0.99)</b> | 0.89(0.77-1.02)        |

  

| <b>birth length</b>                    | <b>group (cm)</b>      |                        |                        |                        |                        |                        |
|----------------------------------------|------------------------|------------------------|------------------------|------------------------|------------------------|------------------------|
|                                        | <b>1</b> (45-48.0)     | <b>2</b> (48.1-49.6)   | <b>3</b> (49.7-51.2)   | <b>4</b> (52.8-54.3)   | <b>5</b> (54.4-55.9)   | <b>6</b> (56.0-59)     |
| autism-spectrum disorders              | 1.06(0.94-1.19)        | 0.95(0.88-1.02)        | <b>0.89(0.84-0.93)</b> | <b>1.18(1.11-1.24)</b> | <b>1.31(1.22-1.39)</b> | <b>1.56(1.40-1.73)</b> |
| schizophrenia-spectrum disorders       | <b>1.34(1.24-1.43)</b> | <b>1.24(1.17-1.29)</b> | <b>1.12(1.08-1.16)</b> | <b>0.94(0.90-0.98)</b> | <b>0.88(0.82-0.92)</b> | <b>0.83(0.74-0.92)</b> |
| autism-infantile                       | 1.20(0.97-1.48)        | 1.01(0.87-1.15)        | <b>0.83(0.74-0.91)</b> | 1.11(0.99-1.23)        | <b>1.25(1.09-1.41)</b> | <b>1.31(1.04-1.62)</b> |
| autism-all types                       | 1.20(0.90-1.14)        | 1.02(0.90-1.14)        | <b>0.86(0.78-0.93)</b> | <b>1.13(1.03-1.23)</b> | <b>1.23(1.10-1.37)</b> | <b>1.37(1.13-1.64)</b> |
| disorders of psychological development | <b>1.17(1.07-1.27)</b> | 1.00(0.94-1.05)        | <b>0.93(0.89-0.96)</b> | <b>1.13(1.08-1.17)</b> | <b>1.21(1.15-1.27)</b> | <b>1.41(1.30-1.53)</b> |
| behavioral and emotional disorders     | <b>1.40(1.31-1.48)</b> | <b>1.17(1.12-1.21)</b> | 1.00(0.97-1.03)        | <b>1.04(1.00-1.07)</b> | <b>1.06(1.01-1.10)</b> | <b>1.18(1.09-1.27)</b> |
| schizophrenia                          | <b>1.45(1.23-1.70)</b> | <b>1.31(1.17-1.46)</b> | <b>1.09(1.00-1.18)</b> | 1.04(0.93-1.14)        | 1.01(0.88-1.15)        | 0.98(0.77-1.24)        |
| schizophrenia-schizotypal-delusional   | <b>1.47(1.30-1.66)</b> | <b>1.26(1.15-1.37)</b> | <b>1.08(1.01-1.15)</b> | 1.03(0.95-1.10)        | 0.99(0.89-1.09)        | 1.00(0.83-1.19)        |
| bipolar disorder                       | 0.73(0.49-1.06)        | 1.03(0.83-1.26)        | 1.04(0.89-1.20)        | 0.89(0.73-1.06)        | 0.87(0.68-1.10)        | 0.90(0.58-1.37)        |
| major depression                       | <b>1.34(1.24-1.44)</b> | <b>1.23(1.16-1.29)</b> | <b>1.13(1.08-1.17)</b> | <b>0.93(0.88-0.97)</b> | <b>0.85(0.79-0.90)</b> | <b>0.80(0.70-0.90)</b> |



*Supplementary Material – Figures and Tables*

**Tables S5-S14.** For each table below, the top 6 rows give results for birth weight or length groups and the following rows give results for covariates entered into the Cox regressions. Values in **bold** indicate *P*-values < 0.05 after Bonferroni correction and red or blue arrows show significantly increased or decreased risk respectively. Missing coefficients (-) were due to a lack of variation for that variable. LCL, lower 95% confidence limit; UCL, upper 95% confidence limit; SE, standard error of the coefficient.

**Table S5.** Risk of infantile autism by birth weight (a) and length (b).

| autism (infantile) [DF84.0] |                |                |                 |      |                |                  |                  |
|-----------------------------|----------------|----------------|-----------------|------|----------------|------------------|------------------|
| (a) birth weight (BW)       |                |                |                 |      |                |                  |                  |
|                             | exp(coef)      | LCL            | UCL             | risk | SE             | Z                | Pr(Z)            |
| <b>BW group 1</b>           | <b>1.83182</b> | <b>1.42743</b> | <b>2.35078</b>  | ▲    | <b>0.12727</b> | <b>4.75625</b>   | <b>&lt;0.001</b> |
| BW group 2                  | 1.04027        | 0.89943        | 1.20316         | .    | 0.07422        | 0.53190          | 0.595            |
| BW group 3                  | 0.93987        | 0.85077        | 1.03830         | .    | 0.05082        | -1.22035         | 0.222            |
| BW group 4                  | 1.05160        | 0.95092        | 1.16294         | .    | 0.05135        | 0.97986          | 0.327            |
| <b>BW group 5</b>           | <b>1.20455</b> | <b>1.04563</b> | <b>1.38763</b>  | ▲    | <b>0.07219</b> | <b>2.57803</b>   | <b>0.010</b>     |
| <b>BW group 6</b>           | <b>1.45410</b> | <b>1.15120</b> | <b>1.83671</b>  | ▲    | <b>0.11918</b> | <b>3.14138</b>   | <b>0.002</b>     |
| maternal disorder           | -              | -              | -               | -    | -              | -                | -                |
| paternal disorder           | -              | -              | -               | -    | -              | -                | -                |
| <b>paternal age</b>         | <b>8.36666</b> | <b>4.54642</b> | <b>15.39694</b> | ▲    | <b>0.31119</b> | <b>6.82631</b>   | <b>&lt;0.001</b> |
| <b>maternal age</b>         | <b>5.18519</b> | <b>2.50629</b> | <b>10.72751</b> | ▲    | <b>0.37093</b> | <b>4.43701</b>   | <b>&lt;0.001</b> |
| preexisting hypertension    | 0.54841        | 0.24550        | 1.22507         | .    | 0.41007        | -1.46493         | 0.143            |
| preexisting diabetes        | 1.17944        | 0.71757        | 1.93859         | .    | 0.25353        | 0.65096          | 0.515            |
| previous abortion (induc.)  | 1.06846        | 0.97499        | 1.17089         | .    | 0.04671        | 1.41780          | 0.156            |
| previous abortion (spont.)  | 1.09761        | 0.99057        | 1.21621         | .    | 0.05235        | 1.77906          | 0.075            |
| <b>education level</b>      | <b>0.97380</b> | <b>0.94863</b> | <b>0.99964</b>  | ▼    | <b>0.01336</b> | <b>-1.98679</b>  | <b>0.047</b>     |
| <b>average income</b>       | <b>0.89170</b> | <b>0.87682</b> | <b>0.90683</b>  | ▼    | <b>0.00859</b> | <b>-13.35180</b> | <b>&lt;0.001</b> |
| <b>gestation length</b>     | <b>0.96493</b> | <b>0.94492</b> | <b>0.98537</b>  | ▼    | <b>0.01069</b> | <b>-3.33881</b>  | <b>0.001</b>     |
| maternal bleeding           | 1.07958        | 0.94671        | 1.23109         | .    | 0.06701        | 1.14271          | 0.253            |
| fetal oxygen deprivation    | -              | -              | -               | -    | -              | -                | -                |
| pregnancy oedema            | 1.01615        | 0.64548        | 1.59967         | .    | 0.23152        | 0.06920          | 0.945            |
| gestational diabetes        | 1.02910        | 0.53336        | 1.98563         | .    | 0.33534        | 0.08554          | 0.932            |
| gestational hypertension    | 1.16285        | 0.97042        | 1.39344         | .    | 0.09230        | 1.63466          | 0.102            |
| <b>APGAR5 score</b>         | <b>0.82925</b> | <b>0.76048</b> | <b>0.90424</b>  | ▼    | <b>0.04417</b> | <b>-4.23914</b>  | <b>&lt;0.001</b> |
| <b>sex</b>                  | <b>0.23630</b> | <b>0.21492</b> | <b>0.25980</b>  | ▼    | <b>0.04838</b> | <b>-29.82113</b> | <b>&lt;0.001</b> |
| <b>birth year cohort</b>    | <b>1.41300</b> | <b>1.38159</b> | <b>1.44513</b>  | ▲    | <b>0.01147</b> | <b>30.13739</b>  | <b>&lt;0.001</b> |
| birth season                | 1.00790        | 0.99699        | 1.01893         | .    | 0.00555        | 1.41759          | 0.156            |
| country                     | 1.00043        | 0.87571        | 1.14290         | .    | 0.06793        | 0.00627          | 0.995            |
| <b>parity(2nd)</b>          | <b>0.88969</b> | <b>0.81577</b> | <b>0.97030</b>  | ▼    | <b>0.04426</b> | <b>-2.64119</b>  | <b>0.008</b>     |
| <b>parity(3rd)</b>          | <b>0.77907</b> | <b>0.68727</b> | <b>0.88312</b>  | ▼    | <b>0.06397</b> | <b>-3.90305</b>  | <b>&lt;0.001</b> |
| <b>parity(4+)</b>           | <b>0.67559</b> | <b>0.55943</b> | <b>0.81587</b>  | ▼    | <b>0.09626</b> | <b>-4.07398</b>  | <b>&lt;0.001</b> |
| <b>region Sjælland</b>      | <b>0.84363</b> | <b>0.75802</b> | <b>0.93892</b>  | ▼    | <b>0.05460</b> | <b>-3.11432</b>  | <b>0.002</b>     |
| <b>region Syddanmark</b>    | <b>0.53260</b> | <b>0.47760</b> | <b>0.59393</b>  | ▼    | <b>0.05561</b> | <b>-11.32900</b> | <b>&lt;0.001</b> |
| <b>region Midtjylland</b>   | <b>0.57154</b> | <b>0.51493</b> | <b>0.63437</b>  | ▼    | <b>0.05321</b> | <b>-10.51314</b> | <b>&lt;0.001</b> |
| <b>region Nordjylland</b>   | <b>0.47744</b> | <b>0.41036</b> | <b>0.55548</b>  | ▼    | <b>0.07724</b> | <b>-9.57146</b>  | <b>&lt;0.001</b> |

*Supplementary Material – Figures and Tables*

| <b>(b) birth length (BL)</b>    |                  |                |                 |             |                |                  |                  |
|---------------------------------|------------------|----------------|-----------------|-------------|----------------|------------------|------------------|
|                                 | <b>exp(coef)</b> | <b>LCL</b>     | <b>UCL</b>      | <b>risk</b> | <b>SE</b>      | <b>Z</b>         | <b>Pr(Z)</b>     |
| BL group 1                      | 1.20230          | 0.97175        | 1.48753         | .           | 0.10862        | 1.69616          | 0.090            |
| BL group 2                      | 1.00862          | 0.87767        | 1.15912         | .           | 0.07096        | 0.12100          | 0.904            |
| <b>BL group 3</b>               | <b>0.82762</b>   | <b>0.74629</b> | <b>0.91780</b>  | <b>∇</b>    | <b>0.05277</b> | <b>-3.58526</b>  | <b>&lt;0.001</b> |
| BL group 4                      | 1.10752          | 0.99536        | 1.23231         | .           | 0.05448        | 1.87457          | 0.061            |
| <b>BL group 5</b>               | <b>1.24677</b>   | <b>1.09519</b> | <b>1.41933</b>  | <b>∧</b>    | <b>0.06614</b> | <b>3.33471</b>   | <b>0.001</b>     |
| <b>BL group 6</b>               | <b>1.30595</b>   | <b>1.04993</b> | <b>1.62441</b>  | <b>∧</b>    | <b>0.11133</b> | <b>2.39756</b>   | <b>0.017</b>     |
| maternal disorder               | -                | -              | -               | -           | -              | -                | -                |
| paternal disorder               | -                | -              | -               | -           | -              | -                | -                |
| <b>paternal age</b>             | <b>9.09445</b>   | <b>4.91081</b> | <b>16.84223</b> | <b>∧</b>    | <b>0.31441</b> | <b>7.02169</b>   | <b>&lt;0.001</b> |
| <b>maternal age</b>             | <b>4.79576</b>   | <b>2.29881</b> | <b>10.00490</b> | <b>∧</b>    | <b>0.37518</b> | <b>4.17860</b>   | <b>&lt;0.001</b> |
| preexisting hypertension        | 0.57741          | 0.25846        | 1.28993         | .           | 0.41011        | -1.33918         | 0.181            |
| preexisting diabetes            | 1.08126          | 0.62506        | 1.87041         | .           | 0.27961        | 0.27940          | 0.780            |
| previous abortion (induc.)      | 1.07239          | 0.97773        | 1.17622         | .           | 0.04715        | 1.48227          | 0.138            |
| previous abortion (spont.)      | 1.10170          | 0.99325        | 1.22199         | .           | 0.05287        | 1.83179          | 0.067            |
| <b>education level</b>          | <b>0.97087</b>   | <b>0.94553</b> | <b>0.99688</b>  | <b>∇</b>    | <b>0.01349</b> | <b>-2.19121</b>  | <b>0.028</b>     |
| <b>average income</b>           | <b>0.88967</b>   | <b>0.87464</b> | <b>0.90494</b>  | <b>∇</b>    | <b>0.00869</b> | <b>-13.45666</b> | <b>&lt;0.001</b> |
| <b>gestation length</b>         | <b>0.97778</b>   | <b>0.95657</b> | <b>0.99947</b>  | <b>∇</b>    | <b>0.01119</b> | <b>-2.00721</b>  | <b>0.045</b>     |
| maternal bleeding               | 1.08700          | 0.95117        | 1.24222         | .           | 0.06810        | 1.22489          | 0.221            |
| fetal oxygen deprivation        | -                | -              | -               | -           | -              | -                | -                |
| pregnancy oedema                | 1.03258          | 0.65587        | 1.62565         | .           | 0.23156        | 0.13845          | 0.890            |
| gestational diabetes            | 1.06637          | 0.55270        | 2.05743         | .           | 0.33531        | 0.19164          | 0.848            |
| <b>gestational hypertension</b> | <b>1.22430</b>   | <b>1.01985</b> | <b>1.46972</b>  | <b>∧</b>    | <b>0.09322</b> | <b>2.17086</b>   | <b>0.030</b>     |
| <b>APGAR5 score</b>             | <b>0.83719</b>   | <b>0.76233</b> | <b>0.91940</b>  | <b>∇</b>    | <b>0.04779</b> | <b>-3.71822</b>  | <b>&lt;0.001</b> |
| <b>sex</b>                      | <b>0.23558</b>   | <b>0.21393</b> | <b>0.25941</b>  | <b>∇</b>    | <b>0.04918</b> | <b>-29.39880</b> | <b>&lt;0.001</b> |
| <b>birth year cohort</b>        | <b>1.41215</b>   | <b>1.38043</b> | <b>1.44460</b>  | <b>∧</b>    | <b>0.01159</b> | <b>29.77416</b>  | <b>&lt;0.001</b> |
| birth season                    | 1.00681          | 0.99580        | 1.01794         | .           | 0.00561        | 1.20936          | 0.227            |
| country                         | 0.99805          | 0.87223        | 1.14202         | .           | 0.06875        | -0.02837         | 0.977            |
| <b>parity(2nd)</b>              | <b>0.88130</b>   | <b>0.80770</b> | <b>0.96160</b>  | <b>∇</b>    | <b>0.04449</b> | <b>-2.84016</b>  | <b>0.005</b>     |
| <b>parity(3rd)</b>              | <b>0.78528</b>   | <b>0.69264</b> | <b>0.89031</b>  | <b>∇</b>    | <b>0.06405</b> | <b>-3.77392</b>  | <b>&lt;0.001</b> |
| <b>parity(4+)</b>               | <b>0.67192</b>   | <b>0.55548</b> | <b>0.81278</b>  | <b>∇</b>    | <b>0.09710</b> | <b>-4.09474</b>  | <b>&lt;0.001</b> |
| <b>region Sjælland</b>          | <b>0.85916</b>   | <b>0.77127</b> | <b>0.95707</b>  | <b>∇</b>    | <b>0.05506</b> | <b>-2.75694</b>  | <b>0.006</b>     |
| <b>region Syddanmark</b>        | <b>0.53723</b>   | <b>0.48120</b> | <b>0.59978</b>  | <b>∇</b>    | <b>0.05620</b> | <b>-11.05614</b> | <b>&lt;0.001</b> |
| <b>region Midtjylland</b>       | <b>0.57142</b>   | <b>0.51418</b> | <b>0.63503</b>  | <b>∇</b>    | <b>0.05385</b> | <b>-10.39230</b> | <b>&lt;0.001</b> |
| <b>region Nordjylland</b>       | <b>0.48224</b>   | <b>0.41421</b> | <b>0.56145</b>  | <b>∇</b>    | <b>0.07759</b> | <b>-9.39958</b>  | <b>&lt;0.001</b> |

Supplementary Material – Figures and Tables

**Table S6.** Risk of autism by birth weight (a) and length (b).

| autism (infantile and atypical) [DF84.0-1] |                 |                |                 |          |                |                  |                  |
|--------------------------------------------|-----------------|----------------|-----------------|----------|----------------|------------------|------------------|
| (a) birth weight (BW)                      |                 |                |                 |          |                |                  |                  |
|                                            | exp(coef)       | LCL            | UCL             | risk     | SE             | Z                | Pr(Z)            |
| <b>BW group 1</b>                          | <b>1.65273</b>  | <b>1.32397</b> | <b>2.06311</b>  | <b>▲</b> | <b>0.11316</b> | <b>4.43997</b>   | <b>&lt;0.001</b> |
| BW group 2                                 | 1.04870         | 0.92728        | 1.18601         | .        | 0.06278        | 0.75737          | 0.449            |
| BW group 3                                 | 0.93510         | 0.85907        | 1.01786         | .        | 0.04327        | -1.55082         | 0.121            |
| BW group 4                                 | 1.05134         | 0.96496        | 1.14545         | .        | 0.04374        | 1.14453          | 0.252            |
| <b>BW group 5</b>                          | <b>1.16717</b>  | <b>1.03284</b> | <b>1.31896</b>  | <b>▲</b> | <b>0.06238</b> | <b>2.47799</b>   | <b>0.013</b>     |
| <b>BW group 6</b>                          | <b>1.49784</b>  | <b>1.23000</b> | <b>1.82400</b>  | <b>▲</b> | <b>0.10052</b> | <b>4.01952</b>   | <b>&lt;0.001</b> |
| <b>maternal disorder</b>                   | <b>21.05811</b> | <b>2.96155</b> | <b>149.7336</b> | <b>▲</b> | <b>1.00082</b> | <b>3.04479</b>   | <b>0.002</b>     |
| paternal disorder                          | -               | -              | -               | -        | -              | -                | -                |
| <b>paternal age</b>                        | <b>8.56543</b>  | <b>5.10346</b> | <b>14.37583</b> | <b>▲</b> | <b>0.26420</b> | <b>8.12932</b>   | <b>&lt;0.001</b> |
| <b>maternal age</b>                        | <b>2.61392</b>  | <b>1.40749</b> | <b>4.85446</b>  | <b>▲</b> | <b>0.31584</b> | <b>3.04217</b>   | <b>0.002</b>     |
| preexisting hypertension                   | 0.70622         | 0.37868        | 1.31705         | .        | 0.31798        | -1.09388         | 0.274            |
| preexisting diabetes                       | 1.24948         | 0.82522        | 1.89186         | .        | 0.21165        | 1.05231          | 0.293            |
| previous abortion (induc.)                 | 1.04975         | 0.97056        | 1.13541         | .        | 0.04002        | 1.21324          | 0.225            |
| previous abortion (spont.)                 | 1.09101         | 0.99956        | 1.19082         | .        | 0.04467        | 1.95005          | 0.051            |
| <b>education level</b>                     | <b>0.95773</b>  | <b>0.93640</b> | <b>0.97955</b>  | <b>▼</b> | <b>0.01149</b> | <b>-3.75755</b>  | <b>&lt;0.001</b> |
| <b>average income</b>                      | <b>0.90197</b>  | <b>0.88916</b> | <b>0.91497</b>  | <b>▼</b> | <b>0.00730</b> | <b>-14.13623</b> | <b>&lt;0.001</b> |
| <b>gestation length</b>                    | <b>0.96637</b>  | <b>0.94921</b> | <b>0.98384</b>  | <b>▼</b> | <b>0.00914</b> | <b>-3.74308</b>  | <b>&lt;0.001</b> |
| maternal bleeding                          | 1.08191         | 0.96692        | 1.21058         | .        | 0.05733        | 1.37319          | 0.170            |
| fetal oxygen deprivation                   | 0.90196         | 0.22527        | 3.61142         | .        | 0.70781        | -0.14577         | 0.884            |
| pregnancy oedema                           | 1.13993         | 0.79415        | 1.63627         | .        | 0.18442        | 0.71015          | 0.478            |
| gestational diabetes                       | 1.21487         | 0.68746        | 2.14689         | .        | 0.29051        | 0.66997          | 0.503            |
| <b>gestational hypertension</b>            | <b>1.16856</b>  | <b>1.00309</b> | <b>1.36133</b>  | <b>▲</b> | <b>0.07790</b> | <b>1.99957</b>   | <b>0.046</b>     |
| <b>APGAR5 score</b>                        | <b>0.81426</b>  | <b>0.75724</b> | <b>0.87558</b>  | <b>▼</b> | <b>0.03704</b> | <b>-5.54718</b>  | <b>&lt;0.001</b> |
| <b>sex</b>                                 | <b>0.27112</b>  | <b>0.25084</b> | <b>0.29304</b>  | <b>▼</b> | <b>0.03967</b> | <b>-32.90055</b> | <b>&lt;0.001</b> |
| <b>birth year cohort</b>                   | <b>1.41936</b>  | <b>1.39213</b> | <b>1.44712</b>  | <b>▲</b> | <b>0.00988</b> | <b>35.43697</b>  | <b>&lt;0.001</b> |
| birth season                               | 1.00457         | 0.99529        | 1.01394         | .        | 0.00474        | 0.96283          | 0.336            |
| <b>country</b>                             | <b>0.88255</b>  | <b>0.78416</b> | <b>0.99330</b>  | <b>▼</b> | <b>0.06031</b> | <b>-2.07143</b>  | <b>0.038</b>     |
| <b>parity(2nd)</b>                         | <b>0.87510</b>  | <b>0.81256</b> | <b>0.94245</b>  | <b>▼</b> | <b>0.03783</b> | <b>-3.52666</b>  | <b>&lt;0.001</b> |
| <b>parity(3rd)</b>                         | <b>0.79305</b>  | <b>0.71232</b> | <b>0.88293</b>  | <b>▼</b> | <b>0.05477</b> | <b>-4.23317</b>  | <b>&lt;0.001</b> |
| <b>parity(4+)</b>                          | <b>0.71072</b>  | <b>0.60430</b> | <b>0.83587</b>  | <b>▼</b> | <b>0.08276</b> | <b>-4.12629</b>  | <b>&lt;0.001</b> |
| <b>region Sjælland</b>                     | <b>0.74274</b>  | <b>0.67599</b> | <b>0.81607</b>  | <b>▼</b> | <b>0.04804</b> | <b>-6.19048</b>  | <b>&lt;0.001</b> |
| <b>region Syddanmark</b>                   | <b>0.51087</b>  | <b>0.46542</b> | <b>0.56076</b>  | <b>▼</b> | <b>0.04754</b> | <b>-14.12840</b> | <b>&lt;0.001</b> |
| <b>region Midtjylland</b>                  | <b>0.59957</b>  | <b>0.54975</b> | <b>0.65390</b>  | <b>▼</b> | <b>0.04426</b> | <b>-11.55803</b> | <b>&lt;0.001</b> |
| <b>region Nordjylland</b>                  | <b>0.46328</b>  | <b>0.40743</b> | <b>0.52677</b>  | <b>▼</b> | <b>0.06554</b> | <b>-11.74056</b> | <b>&lt;0.001</b> |
| (b) birth length (BL)                      |                 |                |                 |          |                |                  |                  |
|                                            | exp(coef)       | LCL            | UCL             | risk     | SE             | Z                | Pr(Z)            |
| BL group 1                                 | 1.19881         | 0.99886        | 1.43878         | .        | 0.09310        | 1.94772          | 0.051            |
| BL group 2                                 | 1.02113         | 0.90679        | 1.14988         | .        | 0.06059        | 0.34508          | 0.730            |
| <b>BL group 3</b>                          | <b>0.85665</b>  | <b>0.78463</b> | <b>0.93528</b>  | <b>▼</b> | <b>0.04481</b> | <b>-3.45331</b>  | <b>0.001</b>     |
| <b>BL group 4</b>                          | <b>1.12941</b>  | <b>1.03085</b> | <b>1.23739</b>  | <b>▲</b> | <b>0.04659</b> | <b>2.61221</b>   | <b>0.009</b>     |
| <b>BL group 5</b>                          | <b>1.23367</b>  | <b>1.10310</b> | <b>1.37970</b>  | <b>▲</b> | <b>0.05708</b> | <b>3.67898</b>   | <b>&lt;0.001</b> |
| <b>BL group 6</b>                          | <b>1.36987</b>  | <b>1.13991</b> | <b>1.64622</b>  | <b>▲</b> | <b>0.09376</b> | <b>3.35657</b>   | <b>0.001</b>     |

*Supplementary Material – Figures and Tables*

|                                   |                 |                |                 |          |                |                  |                  |
|-----------------------------------|-----------------|----------------|-----------------|----------|----------------|------------------|------------------|
| <b>maternal disorder</b>          | <b>22.52592</b> | <b>3.16764</b> | <b>160.1878</b> | <b>^</b> | <b>1.00088</b> | <b>3.11194</b>   | <b>0.002</b>     |
| paternal disorder                 | -               | -              | -               | -        | -              | -                | -                |
| <b>paternal age</b>               | <b>9.09876</b>  | <b>5.39211</b> | <b>15.35343</b> | <b>^</b> | <b>0.26694</b> | <b>8.27191</b>   | <b>&lt;0.001</b> |
| <b>maternal age</b>               | <b>2.52073</b>  | <b>1.34782</b> | <b>4.71434</b>  | <b>^</b> | <b>0.31943</b> | <b>2.89441</b>   | <b>0.004</b>     |
| preexisting hypertension          | 0.66871         | 0.34679        | 1.28948         | .        | 0.33503        | -1.20110         | 0.230            |
| preexisting diabetes              | 1.16765         | 0.74184        | 1.83788         | .        | 0.23144        | 0.66970          | 0.503            |
| previous abortion (induc.)        | 1.05243         | 0.97230        | 1.13917         | .        | 0.04041        | 1.26471          | 0.206            |
| <b>previous abortion (spont.)</b> | <b>1.09553</b>  | <b>1.00284</b> | <b>1.19678</b>  | <b>^</b> | <b>0.04510</b> | <b>2.02275</b>   | <b>0.043</b>     |
| <b>education level</b>            | <b>0.95389</b>  | <b>0.93243</b> | <b>0.97584</b>  | <b>v</b> | <b>0.01161</b> | <b>-4.06721</b>  | <b>&lt;0.001</b> |
| <b>average income</b>             | <b>0.89975</b>  | <b>0.88683</b> | <b>0.91287</b>  | <b>v</b> | <b>0.00738</b> | <b>-14.30656</b> | <b>&lt;0.001</b> |
| <b>gestation length</b>           | <b>0.97797</b>  | <b>0.95980</b> | <b>0.99649</b>  | <b>v</b> | <b>0.00957</b> | <b>-2.32784</b>  | <b>0.020</b>     |
| maternal bleeding                 | 1.09741         | 0.97931        | 1.22975         | .        | 0.05809        | 1.60008          | 0.110            |
| fetal oxygen deprivation          | 0.95385         | 0.23821        | 3.81949         | .        | 0.70785        | -0.06674         | 0.947            |
| pregnancy oedema                  | 1.16017         | 0.80821        | 1.66541         | .        | 0.18444        | 0.80550          | 0.421            |
| gestational diabetes              | 1.26204         | 0.71418        | 2.23017         | .        | 0.29049        | 0.80116          | 0.423            |
| <b>gestational hypertension</b>   | <b>1.22080</b>  | <b>1.04604</b> | <b>1.42477</b>  | <b>^</b> | <b>0.07883</b> | <b>2.53091</b>   | <b>0.011</b>     |
| <b>APGAR5 score</b>               | <b>0.82414</b>  | <b>0.76183</b> | <b>0.89155</b>  | <b>v</b> | <b>0.04011</b> | <b>-4.82161</b>  | <b>&lt;0.001</b> |
| <b>sex</b>                        | <b>0.27033</b>  | <b>0.24978</b> | <b>0.29257</b>  | <b>v</b> | <b>0.04034</b> | <b>-32.42783</b> | <b>&lt;0.001</b> |
| <b>birth year cohort</b>          | <b>1.41957</b>  | <b>1.39204</b> | <b>1.44764</b>  | <b>^</b> | <b>0.00999</b> | <b>35.06562</b>  | <b>&lt;0.001</b> |
| birth season                      | 1.00383         | 0.99445        | 1.01329         | .        | 0.00479        | 0.79770          | 0.425            |
| <b>country</b>                    | <b>0.87429</b>  | <b>0.77559</b> | <b>0.98556</b>  | <b>v</b> | <b>0.06112</b> | <b>-2.19795</b>  | <b>0.028</b>     |
| <b>parity(2nd)</b>                | <b>0.86883</b>  | <b>0.80641</b> | <b>0.93608</b>  | <b>v</b> | <b>0.03804</b> | <b>-3.69664</b>  | <b>&lt;0.001</b> |
| <b>parity(3rd)</b>                | <b>0.79815</b>  | <b>0.71671</b> | <b>0.88883</b>  | <b>v</b> | <b>0.05491</b> | <b>-4.10619</b>  | <b>&lt;0.001</b> |
| <b>parity(4+)</b>                 | <b>0.70744</b>  | <b>0.60068</b> | <b>0.83317</b>  | <b>v</b> | <b>0.08347</b> | <b>-4.14665</b>  | <b>&lt;0.001</b> |
| <b>region Sjælland</b>            | <b>0.75416</b>  | <b>0.68588</b> | <b>0.82923</b>  | <b>v</b> | <b>0.04842</b> | <b>-5.82724</b>  | <b>&lt;0.001</b> |
| <b>region Syddanmark</b>          | <b>0.51135</b>  | <b>0.46534</b> | <b>0.56191</b>  | <b>v</b> | <b>0.04811</b> | <b>-13.94146</b> | <b>&lt;0.001</b> |
| <b>region Midtjylland</b>         | <b>0.59744</b>  | <b>0.54723</b> | <b>0.65226</b>  | <b>v</b> | <b>0.04479</b> | <b>-11.49957</b> | <b>&lt;0.001</b> |
| <b>region Nordjylland</b>         | <b>0.46568</b>  | <b>0.40927</b> | <b>0.52987</b>  | <b>v</b> | <b>0.06588</b> | <b>-11.60084</b> | <b>&lt;0.001</b> |

*Supplementary Material – Figures and Tables*

**Table S7.** Risk of autism-spectrum disorders by birth weight (a) and length (b).

autism-spectrum disorders (infantile, atypical, Asperger's, PDD-NOS) [DF84.0-9]

(a) birth weight (BW)

|                                   | exp(coef)       | LCL            | UCL             | risk     | SE             | Z                | Pr(Z)            |
|-----------------------------------|-----------------|----------------|-----------------|----------|----------------|------------------|------------------|
| <b>BW group 1</b>                 | <b>1.39430</b>  | <b>1.20937</b> | <b>1.60751</b>  | <b>▲</b> | <b>0.07260</b> | <b>4.57833</b>   | <b>&lt;0.001</b> |
| BW group 2                        | 1.00803         | 0.93584        | 1.08580         | .        | 0.03792        | 0.21107          | 0.833            |
| <b>BW group 3</b>                 | <b>0.92366</b>  | <b>0.87791</b> | <b>0.97180</b>  | <b>▼</b> | <b>0.02592</b> | <b>-3.06368</b>  | <b>0.002</b>     |
| <b>BW group 4</b>                 | <b>1.06134</b>  | <b>1.00829</b> | <b>1.11717</b>  | <b>▲</b> | <b>0.02616</b> | <b>2.27557</b>   | <b>0.023</b>     |
| <b>BW group 5</b>                 | <b>1.23414</b>  | <b>1.14844</b> | <b>1.32624</b>  | <b>▲</b> | <b>0.03672</b> | <b>5.72897</b>   | <b>&lt;0.001</b> |
| <b>BW group 6</b>                 | <b>1.53474</b>  | <b>1.36412</b> | <b>1.72671</b>  | <b>▲</b> | <b>0.06013</b> | <b>7.12380</b>   | <b>&lt;0.001</b> |
| <b>maternal disorder</b>          | <b>12.08159</b> | <b>7.26004</b> | <b>20.10524</b> | <b>▲</b> | <b>0.25985</b> | <b>9.58891</b>   | <b>&lt;0.001</b> |
| <b>paternal disorder</b>          | <b>13.36558</b> | <b>8.85498</b> | <b>20.17380</b> | <b>▲</b> | <b>0.21006</b> | <b>12.34282</b>  | <b>&lt;0.001</b> |
| <b>paternal age</b>               | <b>5.89981</b>  | <b>4.31274</b> | <b>8.07092</b>  | <b>▲</b> | <b>0.15987</b> | <b>11.10199</b>  | <b>&lt;0.001</b> |
| <b>maternal age</b>               | <b>2.50420</b>  | <b>1.72160</b> | <b>3.64255</b>  | <b>▲</b> | <b>0.19118</b> | <b>4.80147</b>   | <b>&lt;0.001</b> |
| preexisting hypertension          | 0.77029         | 0.52340        | 1.13365         | .        | 0.19716        | -1.32373         | 0.186            |
| preexisting diabetes              | 1.08497         | 0.82387        | 1.42880         | .        | 0.14046        | 0.58060          | 0.562            |
| <b>previous abortion (induc.)</b> | <b>1.07317</b>  | <b>1.02412</b> | <b>1.12457</b>  | <b>▲</b> | <b>0.02387</b> | <b>2.95834</b>   | <b>0.003</b>     |
| <b>previous abortion (spont.)</b> | <b>1.05889</b>  | <b>1.00436</b> | <b>1.11639</b>  | <b>▲</b> | <b>0.02698</b> | <b>2.12105</b>   | <b>0.034</b>     |
| education level                   | 0.99805         | 0.98434        | 1.01195         | .        | 0.00706        | -0.27679         | 0.782            |
| <b>average income</b>             | <b>0.89346</b>  | <b>0.88584</b> | <b>0.90115</b>  | <b>▼</b> | <b>0.00437</b> | <b>-25.78176</b> | <b>&lt;0.001</b> |
| <b>gestation length</b>           | <b>0.97639</b>  | <b>0.96582</b> | <b>0.98708</b>  | <b>▼</b> | <b>0.00556</b> | <b>-4.30149</b>  | <b>&lt;0.001</b> |
| <b>maternal bleeding</b>          | <b>1.09840</b>  | <b>1.02635</b> | <b>1.17552</b>  | <b>▲</b> | <b>0.03462</b> | <b>2.71126</b>   | <b>0.007</b>     |
| fetal oxygen deprivation          | 0.61299         | 0.25494        | 1.47387         | .        | 0.44761        | -1.09338         | 0.274            |
| pregnancy oedema                  | 0.90462         | 0.71553        | 1.14369         | .        | 0.11964        | -0.83780         | 0.402            |
| <b>gestational diabetes</b>       | <b>1.64674</b>  | <b>1.10109</b> | <b>2.46279</b>  | <b>▲</b> | <b>0.20536</b> | <b>2.42892</b>   | <b>0.015</b>     |
| <b>gestational hypertension</b>   | <b>1.22467</b>  | <b>1.12129</b> | <b>1.33758</b>  | <b>▲</b> | <b>0.04499</b> | <b>4.50429</b>   | <b>&lt;0.001</b> |
| <b>APGAR5 score</b>               | <b>0.84938</b>  | <b>0.81216</b> | <b>0.88831</b>  | <b>▼</b> | <b>0.02286</b> | <b>-7.14023</b>  | <b>&lt;0.001</b> |
| <b>sex</b>                        | <b>0.25295</b>  | <b>0.24117</b> | <b>0.26531</b>  | <b>▼</b> | <b>0.02434</b> | <b>-56.46915</b> | <b>&lt;0.001</b> |
| <b>birth year cohort</b>          | <b>1.40010</b>  | <b>1.38348</b> | <b>1.41692</b>  | <b>▲</b> | <b>0.00609</b> | <b>55.22799</b>  | <b>&lt;0.001</b> |
| <b>birth season</b>               | <b>1.01273</b>  | <b>1.00711</b> | <b>1.01839</b>  | <b>▲</b> | <b>0.00284</b> | <b>4.45482</b>   | <b>&lt;0.001</b> |
| <b>country</b>                    | <b>0.56034</b>  | <b>0.51287</b> | <b>0.61220</b>  | <b>▼</b> | <b>0.04516</b> | <b>-12.82440</b> | <b>&lt;0.001</b> |
| <b>parity(2nd)</b>                | <b>0.79049</b>  | <b>0.75621</b> | <b>0.82632</b>  | <b>▼</b> | <b>0.02262</b> | <b>-10.39387</b> | <b>&lt;0.001</b> |
| <b>parity(3rd)</b>                | <b>0.70337</b>  | <b>0.65835</b> | <b>0.75145</b>  | <b>▼</b> | <b>0.03374</b> | <b>-10.42840</b> | <b>&lt;0.001</b> |
| <b>parity(4+)</b>                 | <b>0.60519</b>  | <b>0.54416</b> | <b>0.67306</b>  | <b>▼</b> | <b>0.05423</b> | <b>-9.26015</b>  | <b>&lt;0.001</b> |
| <b>region Sjælland</b>            | <b>0.64464</b>  | <b>0.60634</b> | <b>0.68537</b>  | <b>▼</b> | <b>0.03126</b> | <b>-14.04759</b> | <b>&lt;0.001</b> |
| <b>region Syddanmark</b>          | <b>0.59436</b>  | <b>0.56266</b> | <b>0.62783</b>  | <b>▼</b> | <b>0.02796</b> | <b>-18.60949</b> | <b>&lt;0.001</b> |
| <b>region Midtjylland</b>         | <b>0.74242</b>  | <b>0.70595</b> | <b>0.78077</b>  | <b>▼</b> | <b>0.02570</b> | <b>-11.59007</b> | <b>&lt;0.001</b> |
| <b>region Nordjylland</b>         | <b>0.58915</b>  | <b>0.54856</b> | <b>0.63274</b>  | <b>▼</b> | <b>0.03642</b> | <b>-14.52795</b> | <b>&lt;0.001</b> |

(b) birth length (BL)

|                   | exp(coef)      | LCL            | UCL            | risk     | SE             | Z               | Pr(Z)            |
|-------------------|----------------|----------------|----------------|----------|----------------|-----------------|------------------|
| BL group 1        | 1.06435        | 0.94836        | 1.19452        | .        | 0.05887        | 1.05932         | 0.289            |
| BL group 2        | 0.95495        | 0.88737        | 1.02768        | .        | 0.03745        | -1.23082        | 0.218            |
| <b>BL group 3</b> | <b>0.88958</b> | <b>0.84428</b> | <b>0.93732</b> | <b>▼</b> | <b>0.02667</b> | <b>-4.38675</b> | <b>&lt;0.001</b> |
| <b>BL group 4</b> | <b>1.17947</b> | <b>1.11679</b> | <b>1.24568</b> | <b>▲</b> | <b>0.02786</b> | <b>5.92400</b>  | <b>&lt;0.001</b> |
| <b>BL group 5</b> | <b>1.30871</b> | <b>1.22483</b> | <b>1.39833</b> | <b>▲</b> | <b>0.03379</b> | <b>7.96122</b>  | <b>&lt;0.001</b> |

*Supplementary Material – Figures and Tables*

|                                   |                 |                |                 |          |                |                  |                  |
|-----------------------------------|-----------------|----------------|-----------------|----------|----------------|------------------|------------------|
| <b>BL group 6</b>                 | <b>1.56050</b>  | <b>1.40482</b> | <b>1.73342</b>  | <b>^</b> | <b>0.05362</b> | <b>8.29935</b>   | <b>&lt;0.001</b> |
| <b>maternal disorder</b>          | <b>12.09829</b> | <b>7.27132</b> | <b>20.12957</b> | <b>^</b> | <b>0.25976</b> | <b>9.59745</b>   | <b>&lt;0.001</b> |
| <b>paternal disorder</b>          | <b>13.66294</b> | <b>9.05301</b> | <b>20.62032</b> | <b>^</b> | <b>0.21000</b> | <b>12.45098</b>  | <b>&lt;0.001</b> |
| <b>paternal age</b>               | <b>5.83242</b>  | <b>4.24909</b> | <b>8.00573</b>  | <b>^</b> | <b>0.16160</b> | <b>10.91244</b>  | <b>&lt;0.001</b> |
| <b>maternal age</b>               | <b>2.45160</b>  | <b>1.67860</b> | <b>3.58059</b>  | <b>^</b> | <b>0.19326</b> | <b>4.64005</b>   | <b>&lt;0.001</b> |
| preexisting hypertension          | 0.74565         | 0.49880        | 1.11469         | .        | 0.20514        | -1.43070         | 0.153            |
| preexisting diabetes              | 1.09035         | 0.81731        | 1.45461         | .        | 0.14706        | 0.58818          | 0.556            |
| <b>previous abortion (induc.)</b> | <b>1.07456</b>  | <b>1.02500</b> | <b>1.12651</b>  | <b>^</b> | <b>0.02409</b> | <b>2.98501</b>   | <b>0.003</b>     |
| <b>previous abortion (spont.)</b> | <b>1.06317</b>  | <b>1.00795</b> | <b>1.12141</b>  | <b>^</b> | <b>0.02721</b> | <b>2.25078</b>   | <b>0.024</b>     |
| education level                   | 0.99662         | 0.98280        | 1.01063         | .        | 0.00712        | -0.47555         | 0.634            |
| <b>average income</b>             | <b>0.89240</b>  | <b>0.88472</b> | <b>0.90016</b>  | <b>v</b> | <b>0.00441</b> | <b>-25.78811</b> | <b>&lt;0.001</b> |
| <b>gestation length</b>           | <b>0.98377</b>  | <b>0.97269</b> | <b>0.99497</b>  | <b>v</b> | <b>0.00578</b> | <b>-2.83256</b>  | <b>0.005</b>     |
| <b>maternal bleeding</b>          | <b>1.11357</b>  | <b>1.03975</b> | <b>1.19263</b>  | <b>^</b> | <b>0.03500</b> | <b>3.07372</b>   | <b>0.002</b>     |
| fetal oxygen deprivation          | 0.63750         | 0.26513        | 1.53287         | .        | 0.44763        | -1.00573         | 0.315            |
| pregnancy oedema                  | 0.90345         | 0.71342        | 1.14410         | .        | 0.12049        | -0.84268         | 0.399            |
| <b>gestational diabetes</b>       | <b>1.70407</b>  | <b>1.13944</b> | <b>2.54850</b>  | <b>^</b> | <b>0.20535</b> | <b>2.59565</b>   | <b>0.009</b>     |
| <b>gestational hypertension</b>   | <b>1.24895</b>  | <b>1.14197</b> | <b>1.36595</b>  | <b>^</b> | <b>0.04569</b> | <b>4.86559</b>   | <b>&lt;0.001</b> |
| <b>APGAR5 score</b>               | <b>0.85386</b>  | <b>0.81393</b> | <b>0.89574</b>  | <b>v</b> | <b>0.02443</b> | <b>-6.46686</b>  | <b>&lt;0.001</b> |
| <b>sex</b>                        | <b>0.25359</b>  | <b>0.24160</b> | <b>0.26618</b>  | <b>v</b> | <b>0.02471</b> | <b>-55.51948</b> | <b>&lt;0.001</b> |
| <b>birth year cohort</b>          | <b>1.40069</b>  | <b>1.38390</b> | <b>1.41768</b>  | <b>^</b> | <b>0.00615</b> | <b>54.76358</b>  | <b>&lt;0.001</b> |
| <b>birth season</b>               | <b>1.01262</b>  | <b>1.00695</b> | <b>1.01833</b>  | <b>^</b> | <b>0.00287</b> | <b>4.37370</b>   | <b>&lt;0.001</b> |
| <b>country</b>                    | <b>0.56125</b>  | <b>0.51323</b> | <b>0.61376</b>  | <b>v</b> | <b>0.04564</b> | <b>-12.65630</b> | <b>&lt;0.001</b> |
| <b>parity(2nd)</b>                | <b>0.79009</b>  | <b>0.75573</b> | <b>0.82602</b>  | <b>v</b> | <b>0.02269</b> | <b>-10.38334</b> | <b>&lt;0.001</b> |
| <b>parity(3rd)</b>                | <b>0.70412</b>  | <b>0.65886</b> | <b>0.75248</b>  | <b>v</b> | <b>0.03389</b> | <b>-10.35007</b> | <b>&lt;0.001</b> |
| <b>parity(4+)</b>                 | <b>0.60835</b>  | <b>0.54665</b> | <b>0.67700</b>  | <b>v</b> | <b>0.05456</b> | <b>-9.10999</b>  | <b>&lt;0.001</b> |
| <b>region Sjælland</b>            | <b>0.65103</b>  | <b>0.61205</b> | <b>0.69250</b>  | <b>v</b> | <b>0.03150</b> | <b>-13.62464</b> | <b>&lt;0.001</b> |
| <b>region Syddanmark</b>          | <b>0.59629</b>  | <b>0.56418</b> | <b>0.63023</b>  | <b>v</b> | <b>0.02824</b> | <b>-18.30679</b> | <b>&lt;0.001</b> |
| <b>region Midtjylland</b>         | <b>0.74220</b>  | <b>0.70538</b> | <b>0.78094</b>  | <b>v</b> | <b>0.02596</b> | <b>-11.48484</b> | <b>&lt;0.001</b> |
| <b>region Nordjylland</b>         | <b>0.59079</b>  | <b>0.54985</b> | <b>0.63479</b>  | <b>v</b> | <b>0.03665</b> | <b>-14.36078</b> | <b>&lt;0.001</b> |

*Supplementary Material – Figures and Tables*

**Table S8.** Risk of disorders of psychological development by birth weight (a) and length (b).

| disorders of psychological development [DF80-89] |           |         |         |      |         |           |        |
|--------------------------------------------------|-----------|---------|---------|------|---------|-----------|--------|
| (a) birth weight (BW)                            |           |         |         |      |         |           |        |
|                                                  | exp(coef) | LCL     | UCL     | risk | SE      | Z         | Pr(Z)  |
| BW group 1                                       | 1.56176   | 1.40870 | 1.73146 | ▲    | 0.05263 | 8.47105   | <0.001 |
| BW group 2                                       | 1.10178   | 1.04293 | 1.16396 | ▲    | 0.02801 | 3.46062   | 0.001  |
| BW group 3                                       | 0.96038   | 0.92415 | 0.99803 | ▼    | 0.01962 | -2.06048  | 0.039  |
| BW group 4                                       | 1.06280   | 1.02191 | 1.10532 | ▲    | 0.02002 | 3.04295   | 0.002  |
| BW group 5                                       | 1.16863   | 1.10466 | 1.23631 | ▲    | 0.02872 | 5.42554   | <0.001 |
| BW group 6                                       | 1.46828   | 1.33921 | 1.60980 | ▲    | 0.04695 | 8.18152   | <0.001 |
| maternal disorder                                | 3.99716   | 2.82395 | 5.65777 | ▲    | 0.17727 | 7.81615   | <0.001 |
| paternal disorder                                | 3.61045   | 2.72595 | 4.78194 | ▲    | 0.14338 | 8.95417   | <0.001 |
| paternal age                                     | 3.48352   | 2.74996 | 4.41275 | ▲    | 0.12064 | 10.34493  | <0.001 |
| maternal age                                     | 0.95289   | 0.71859 | 1.26359 | .    | 0.14399 | -0.33514  | 0.738  |
| preexisting hypertension                         | 0.76874   | 0.56924 | 1.03815 | .    | 0.15329 | -1.71570  | 0.086  |
| preexisting diabetes                             | 1.19712   | 0.98227 | 1.45897 | .    | 0.10093 | 1.78270   | 0.075  |
| previous abortion (induc.)                       | 1.11454   | 1.07592 | 1.15455 | ▲    | 0.01800 | 6.02606   | <0.001 |
| previous abortion (spont.)                       | 1.10030   | 1.05759 | 1.14473 | ▲    | 0.02020 | 4.73246   | <0.001 |
| education level                                  | 0.94773   | 0.93773 | 0.95785 | ▼    | 0.00542 | -9.90878  | <0.001 |
| average income                                   | 0.88499   | 0.87918 | 0.89085 | ▼    | 0.00336 | -36.32376 | <0.001 |
| gestation length                                 | 0.96600   | 0.95813 | 0.97393 | ▼    | 0.00417 | -8.29338  | <0.001 |
| maternal bleeding                                | 1.14912   | 1.09256 | 1.20861 | ▲    | 0.02575 | 5.39726   | <0.001 |
| fetal oxygen deprivation                         | 0.75302   | 0.43693 | 1.29780 | .    | 0.27772 | -1.02137  | 0.307  |
| pregnancy oedema                                 | 1.01841   | 0.86271 | 1.20222 | .    | 0.08466 | 0.21552   | 0.829  |
| gestational diabetes                             | 1.41470   | 0.96857 | 2.06632 | .    | 0.19330 | 1.79476   | 0.073  |
| gestational hypertension                         | 1.16275   | 1.08607 | 1.24484 | ▲    | 0.03481 | 4.33218   | <0.001 |
| APGAR5 score                                     | 0.85316   | 0.82452 | 0.88279 | ▼    | 0.01742 | -9.11662  | <0.001 |
| sex                                              | 0.29252   | 0.28252 | 0.30287 | ▼    | 0.01775 | -69.26244 | <0.001 |
| birth year cohort                                | 1.32329   | 1.31198 | 1.33470 | ▲    | 0.00438 | 63.96149  | <0.001 |
| birth season                                     | 1.01632   | 1.01203 | 1.02062 | ▲    | 0.00216 | 7.50027   | <0.001 |
| country                                          | 0.46494   | 0.43359 | 0.49856 | ▼    | 0.03562 | -21.50110 | <0.001 |
| parity(2nd)                                      | 0.90601   | 0.87592 | 0.93713 | ▼    | 0.01723 | -5.72853  | <0.001 |
| parity(3rd)                                      | 0.82828   | 0.78787 | 0.87077 | ▼    | 0.02552 | -7.38217  | <0.001 |
| parity(4+)                                       | 0.73227   | 0.67647 | 0.79267 | ▼    | 0.04044 | -7.70587  | <0.001 |
| region Sjælland                                  | 0.60099   | 0.57192 | 0.63154 | ▼    | 0.02530 | -20.12832 | <0.001 |
| region Syddanmark                                | 0.64085   | 0.61431 | 0.66853 | ▼    | 0.02158 | -20.61974 | <0.001 |
| region Midtjylland                               | 0.98007   | 0.94437 | 1.01711 | .    | 0.01893 | -1.06360  | 0.288  |
| region Nordjylland                               | 0.62131   | 0.58811 | 0.65637 | ▼    | 0.02801 | -16.99023 | <0.001 |

**(b) birth length (BL)**

|            | exp(coef) | LCL     | UCL     | risk | SE      | Z        | Pr(Z)  |
|------------|-----------|---------|---------|------|---------|----------|--------|
| BL group 1 | 1.16835   | 1.07411 | 1.27085 | ▲    | 0.04291 | 3.62635  | <0.001 |
| BL group 2 | 1.00249   | 0.94906 | 1.05893 | .    | 0.02795 | 0.08897  | 0.929  |
| BL group 3 | 0.93147   | 0.89563 | 0.96875 | ▼    | 0.02002 | -3.54589 | <0.001 |
| BL group 4 | 1.12669   | 1.08024 | 1.17515 | ▲    | 0.02148 | 5.55290  | <0.001 |

*Supplementary Material – Figures and Tables*

|                                   |                |                |                |          |                |                  |                  |
|-----------------------------------|----------------|----------------|----------------|----------|----------------|------------------|------------------|
| <b>BL group 5</b>                 | <b>1.21416</b> | <b>1.15292</b> | <b>1.27865</b> | <b>▲</b> | <b>0.02641</b> | <b>7.34890</b>   | <b>&lt;0.001</b> |
| <b>BL group 6</b>                 | <b>1.41326</b> | <b>1.30009</b> | <b>1.53629</b> | <b>▲</b> | <b>0.04259</b> | <b>8.12206</b>   | <b>&lt;0.001</b> |
| <b>maternal disorder</b>          | <b>4.14804</b> | <b>2.93054</b> | <b>5.87137</b> | <b>▲</b> | <b>0.17727</b> | <b>8.02506</b>   | <b>&lt;0.001</b> |
| <b>paternal disorder</b>          | <b>3.68367</b> | <b>2.78113</b> | <b>4.87911</b> | <b>▲</b> | <b>0.14340</b> | <b>9.09299</b>   | <b>&lt;0.001</b> |
| <b>paternal age</b>               | <b>3.48503</b> | <b>2.74368</b> | <b>4.42670</b> | <b>▲</b> | <b>0.12203</b> | <b>10.23074</b>  | <b>&lt;0.001</b> |
| maternal age                      | 0.97357        | 0.73174        | 1.29532        | .        | 0.14569        | -0.18387         | 0.854            |
| preexisting hypertension          | 0.75416        | 0.55235        | 1.02971        | .        | 0.15889        | -1.77570         | 0.076            |
| preexisting diabetes              | 1.17227        | 0.95061        | 1.44563        | .        | 0.10694        | 1.48629          | 0.137            |
| <b>previous abortion (induc.)</b> | <b>1.11113</b> | <b>1.07220</b> | <b>1.15147</b> | <b>▲</b> | <b>0.01820</b> | <b>5.79047</b>   | <b>&lt;0.001</b> |
| <b>previous abortion (spont.)</b> | <b>1.10049</b> | <b>1.05732</b> | <b>1.14542</b> | <b>▲</b> | <b>0.02042</b> | <b>4.68976</b>   | <b>&lt;0.001</b> |
| <b>education level</b>            | <b>0.94579</b> | <b>0.93570</b> | <b>0.95598</b> | <b>▼</b> | <b>0.00547</b> | <b>-10.18996</b> | <b>&lt;0.001</b> |
| <b>average income</b>             | <b>0.88374</b> | <b>0.87787</b> | <b>0.88965</b> | <b>▼</b> | <b>0.00340</b> | <b>-36.34642</b> | <b>&lt;0.001</b> |
| <b>gestation length</b>           | <b>0.97399</b> | <b>0.96572</b> | <b>0.98233</b> | <b>▼</b> | <b>0.00435</b> | <b>-6.05698</b>  | <b>&lt;0.001</b> |
| <b>maternal bleeding</b>          | <b>1.15856</b> | <b>1.10072</b> | <b>1.21943</b> | <b>▲</b> | <b>0.02613</b> | <b>5.63254</b>   | <b>&lt;0.001</b> |
| fetal oxygen deprivation          | 0.78206        | 0.45376        | 1.34789        | .        | 0.27774        | -0.88507         | 0.376            |
| pregnancy oedema                  | 1.01839        | 0.86168        | 1.20361        | .        | 0.08526        | 0.21378          | 0.831            |
| <b>gestational diabetes</b>       | <b>1.46587</b> | <b>1.00361</b> | <b>2.14103</b> | <b>▲</b> | <b>0.19329</b> | <b>1.97862</b>   | <b>0.048</b>     |
| <b>gestational hypertension</b>   | <b>1.19015</b> | <b>1.11047</b> | <b>1.27555</b> | <b>▲</b> | <b>0.03536</b> | <b>4.92340</b>   | <b>&lt;0.001</b> |
| <b>APGAR5 score</b>               | <b>0.85802</b> | <b>0.82720</b> | <b>0.88999</b> | <b>▼</b> | <b>0.01866</b> | <b>-8.20379</b>  | <b>&lt;0.001</b> |
| <b>sex</b>                        | <b>0.29336</b> | <b>0.28318</b> | <b>0.30391</b> | <b>▼</b> | <b>0.01802</b> | <b>-68.05055</b> | <b>&lt;0.001</b> |
| <b>birth year cohort</b>          | <b>1.32283</b> | <b>1.31142</b> | <b>1.33435</b> | <b>▲</b> | <b>0.00442</b> | <b>63.27202</b>  | <b>&lt;0.001</b> |
| <b>birth season</b>               | <b>1.01623</b> | <b>1.01189</b> | <b>1.02058</b> | <b>▲</b> | <b>0.00218</b> | <b>7.38235</b>   | <b>&lt;0.001</b> |
| <b>country</b>                    | <b>0.46503</b> | <b>0.43331</b> | <b>0.49908</b> | <b>▼</b> | <b>0.03605</b> | <b>-21.23810</b> | <b>&lt;0.001</b> |
| <b>parity(2nd)</b>                | <b>0.90077</b> | <b>0.87072</b> | <b>0.93185</b> | <b>▼</b> | <b>0.01731</b> | <b>-6.03718</b>  | <b>&lt;0.001</b> |
| <b>parity(3rd)</b>                | <b>0.82436</b> | <b>0.78392</b> | <b>0.86690</b> | <b>▼</b> | <b>0.02567</b> | <b>-7.52476</b>  | <b>&lt;0.001</b> |
| <b>parity(4+)</b>                 | <b>0.72949</b> | <b>0.67349</b> | <b>0.79014</b> | <b>▼</b> | <b>0.04075</b> | <b>-7.74016</b>  | <b>&lt;0.001</b> |
| <b>region Sjælland</b>            | <b>0.60515</b> | <b>0.57556</b> | <b>0.63627</b> | <b>▼</b> | <b>0.02558</b> | <b>-19.63378</b> | <b>&lt;0.001</b> |
| <b>region Syddanmark</b>          | <b>0.64346</b> | <b>0.61650</b> | <b>0.67160</b> | <b>▼</b> | <b>0.02184</b> | <b>-20.18973</b> | <b>&lt;0.001</b> |
| region Midtjylland                | 0.98428        | 0.94805        | 1.02190        | .        | 0.01914        | -0.82780         | 0.408            |
| <b>region Nordjylland</b>         | <b>0.62402</b> | <b>0.59046</b> | <b>0.65949</b> | <b>▼</b> | <b>0.02821</b> | <b>-16.71872</b> | <b>&lt;0.001</b> |



*Supplementary Material – Figures and Tables*

**Table S9.** Risk of behavioral and emotional disorders by birth weight (a) and length (b).

| behavioral and emotional disorders with onset in childhood and adolescence [DF90-98] |           |         |         |      |         |           |        |
|--------------------------------------------------------------------------------------|-----------|---------|---------|------|---------|-----------|--------|
| (a) birth weight (BW)                                                                |           |         |         |      |         |           |        |
|                                                                                      | exp(coef) | LCL     | UCL     | risk | SE      | Z         | Pr(Z)  |
| BW group 1                                                                           | 1.63323   | 1.50912 | 1.76754 | ▲    | 0.04032 | 12.16547  | <0.001 |
| BW group 2                                                                           | 1.21274   | 1.16340 | 1.26418 | ▲    | 0.02119 | 9.10132   | <0.001 |
| BW group 3                                                                           | 1.03096   | 1.00076 | 1.06207 | ▲    | 0.01517 | 2.01019   | 0.044  |
| BW group 4                                                                           | 0.97950   | 0.94875 | 1.01124 | .    | 0.01627 | -1.27290  | 0.203  |
| BW group 5                                                                           | 1.02353   | 0.97622 | 1.07313 | .    | 0.02414 | 0.96328   | 0.335  |
| BW group 6                                                                           | 1.23077   | 1.13626 | 1.33315 | ▲    | 0.04077 | 5.09338   | <0.001 |
| maternal disorder                                                                    | 3.44810   | 3.15642 | 3.76675 | ▲    | 0.04510 | 27.44852  | <0.001 |
| paternal disorder                                                                    | 2.80617   | 2.52425 | 3.11957 | ▲    | 0.05402 | 19.10102  | <0.001 |
| paternal age                                                                         | 1.49203   | 1.24366 | 1.79000 | ▲    | 0.09290 | 4.30718   | <0.001 |
| maternal age                                                                         | 0.20266   | 0.16285 | 0.25221 | ▼    | 0.11160 | -14.30379 | <0.001 |
| preexisting hypertension                                                             | 0.80826   | 0.63062 | 1.03593 | .    | 0.12662 | -1.68121  | 0.093  |
| preexisting diabetes                                                                 | 1.23017   | 1.05040 | 1.44072 | ▲    | 0.08061 | 2.56993   | 0.010  |
| previous abortion (induc.)                                                           | 1.19452   | 1.16247 | 1.22747 | ▲    | 0.01388 | 12.80559  | <0.001 |
| previous abortion (spont.)                                                           | 1.10941   | 1.07524 | 1.14467 | ▲    | 0.01596 | 6.50472   | <0.001 |
| education level                                                                      | 0.87715   | 0.86965 | 0.88472 | ▼    | 0.00438 | -29.91251 | <0.001 |
| average income                                                                       | 0.86154   | 0.85701 | 0.86610 | ▼    | 0.00269 | -55.35771 | <0.001 |
| gestation length                                                                     | 0.96374   | 0.95756 | 0.96996 | ▼    | 0.00328 | -11.25245 | <0.001 |
| maternal bleeding                                                                    | 1.22074   | 1.17429 | 1.26902 | ▲    | 0.01979 | 10.07833  | <0.001 |
| fetal oxygen deprivation                                                             | 1.03673   | 0.73262 | 1.46707 | .    | 0.17715 | 0.20362   | 0.839  |
| pregnancy oedema                                                                     | 1.09404   | 0.96988 | 1.23410 | .    | 0.06146 | 1.46232   | 0.144  |
| gestational diabetes                                                                 | 1.06703   | 0.67140 | 1.69579 | .    | 0.23637 | 0.27448   | 0.784  |
| gestational hypertension                                                             | 1.13620   | 1.07597 | 1.19980 | ▲    | 0.02779 | 4.59502   | <0.001 |
| APGAR5 score                                                                         | 0.89619   | 0.87121 | 0.92190 | ▼    | 0.01443 | -7.59644  | <0.001 |
| sex                                                                                  | 0.43824   | 0.42742 | 0.44934 | ▼    | 0.01276 | -64.64437 | <0.001 |
| birth year cohort                                                                    | 1.32077   | 1.31168 | 1.32991 | ▲    | 0.00352 | 78.99765  | <0.001 |
| birth season                                                                         | 1.01419   | 1.01080 | 1.01758 | ▲    | 0.00171 | 8.26211   | <0.001 |
| country                                                                              | 0.29574   | 0.27809 | 0.31451 | ▼    | 0.03139 | -38.80725 | <0.001 |
| parity(2nd)                                                                          | 1.01432   | 0.98723 | 1.04214 | .    | 0.01381 | 1.02944   | 0.303  |
| parity(3rd)                                                                          | 1.03267   | 0.99253 | 1.07444 | .    | 0.02023 | 1.58927   | 0.112  |
| parity(4+)                                                                           | 0.98680   | 0.92838 | 1.04891 | .    | 0.03114 | -0.42658  | 0.670  |
| region Sjælland                                                                      | 0.74424   | 0.71765 | 0.77181 | ▼    | 0.01856 | -15.91483 | <0.001 |
| region Syddanmark                                                                    | 0.77739   | 0.75307 | 0.80249 | ▼    | 0.01621 | -15.53049 | <0.001 |
| region Midtjylland                                                                   | 0.87276   | 0.84635 | 0.89999 | ▼    | 0.01568 | -8.68141  | <0.001 |
| region Nordjylland                                                                   | 0.43949   | 0.41821 | 0.46185 | ▼    | 0.02532 | -32.46975 | <0.001 |

(b) birth length (BL)

|            | exp(coef) | LCL     | UCL     | risk | SE      | Z        | Pr(Z)  |
|------------|-----------|---------|---------|------|---------|----------|--------|
| BL group 1 | 1.39922   | 1.31627 | 1.48741 | ▲    | 0.03118 | 10.77242 | <0.001 |
| BL group 2 | 1.16856   | 1.12168 | 1.21739 | ▲    | 0.02089 | 7.45661  | <0.001 |
| BL group 3 | 1.00459   | 0.97445 | 1.03566 | .    | 0.01554 | 0.29470  | 0.768  |
| BL group 4 | 1.04066   | 1.00547 | 1.07708 | ▲    | 0.01755 | 2.27075  | 0.023  |

*Supplementary Material – Figures and Tables*

|                                   |                |                |                |          |                |                  |                  |
|-----------------------------------|----------------|----------------|----------------|----------|----------------|------------------|------------------|
| <b>BL group 5</b>                 | <b>1.05568</b> | <b>1.01078</b> | <b>1.10258</b> | <b>^</b> | <b>0.02217</b> | <b>2.44371</b>   | <b>0.015</b>     |
| <b>BL group 6</b>                 | <b>1.18179</b> | <b>1.09933</b> | <b>1.27043</b> | <b>^</b> | <b>0.03690</b> | <b>4.52632</b>   | <b>&lt;0.001</b> |
| <b>maternal disorder</b>          | <b>3.47888</b> | <b>3.18132</b> | <b>3.80427</b> | <b>^</b> | <b>0.04562</b> | <b>27.32764</b>  | <b>&lt;0.001</b> |
| <b>paternal disorder</b>          | <b>2.82410</b> | <b>2.53881</b> | <b>3.14145</b> | <b>^</b> | <b>0.05433</b> | <b>19.10742</b>  | <b>&lt;0.001</b> |
| <b>paternal age</b>               | <b>1.48923</b> | <b>1.23917</b> | <b>1.78976</b> | <b>^</b> | <b>0.09379</b> | <b>4.24643</b>   | <b>&lt;0.001</b> |
| <b>maternal age</b>               | <b>0.21252</b> | <b>0.17040</b> | <b>0.26504</b> | <b>v</b> | <b>0.11269</b> | <b>-13.74375</b> | <b>&lt;0.001</b> |
| preexisting hypertension          | 0.83211        | 0.64665        | 1.07075        | .        | 0.12865        | -1.42862         | 0.153            |
| <b>preexisting diabetes</b>       | <b>1.20534</b> | <b>1.02227</b> | <b>1.42119</b> | <b>^</b> | <b>0.08405</b> | <b>2.22205</b>   | <b>0.026</b>     |
| <b>previous abortion (induc.)</b> | <b>1.19077</b> | <b>1.15851</b> | <b>1.22392</b> | <b>^</b> | <b>0.01401</b> | <b>12.46199</b>  | <b>&lt;0.001</b> |
| <b>previous abortion (spont.)</b> | <b>1.10849</b> | <b>1.07403</b> | <b>1.14406</b> | <b>^</b> | <b>0.01612</b> | <b>6.39142</b>   | <b>&lt;0.001</b> |
| <b>education level</b>            | <b>0.87548</b> | <b>0.86793</b> | <b>0.88309</b> | <b>v</b> | <b>0.00442</b> | <b>-30.10551</b> | <b>&lt;0.001</b> |
| <b>average income</b>             | <b>0.86080</b> | <b>0.85623</b> | <b>0.86539</b> | <b>v</b> | <b>0.00272</b> | <b>-55.18011</b> | <b>&lt;0.001</b> |
| <b>gestation length</b>           | <b>0.96729</b> | <b>0.96086</b> | <b>0.97377</b> | <b>v</b> | <b>0.00341</b> | <b>-9.76274</b>  | <b>&lt;0.001</b> |
| <b>maternal bleeding</b>          | <b>1.22827</b> | <b>1.18097</b> | <b>1.27747</b> | <b>^</b> | <b>0.02004</b> | <b>10.26073</b>  | <b>&lt;0.001</b> |
| fetal oxygen deprivation          | 1.06453        | 0.75225        | 1.50645        | .        | 0.17716        | 0.35297          | 0.724            |
| pregnancy oedema                  | 1.10541        | 0.97994        | 1.24693        | .        | 0.06147        | 1.63036          | 0.103            |
| gestational diabetes              | 0.97446        | 0.59625        | 1.59258        | .        | 0.25063        | -0.10321         | 0.918            |
| <b>gestational hypertension</b>   | <b>1.14610</b> | <b>1.08437</b> | <b>1.21134</b> | <b>^</b> | <b>0.02825</b> | <b>4.82759</b>   | <b>&lt;0.001</b> |
| <b>APGAR5 score</b>               | <b>0.89374</b> | <b>0.86735</b> | <b>0.92093</b> | <b>v</b> | <b>0.01529</b> | <b>-7.34630</b>  | <b>&lt;0.001</b> |
| <b>sex</b>                        | <b>0.43447</b> | <b>0.42357</b> | <b>0.44566</b> | <b>v</b> | <b>0.01297</b> | <b>-64.28313</b> | <b>&lt;0.001</b> |
| <b>birth year cohort</b>          | <b>1.32089</b> | <b>1.31173</b> | <b>1.33012</b> | <b>^</b> | <b>0.00355</b> | <b>78.40134</b>  | <b>&lt;0.001</b> |
| <b>birth season</b>               | <b>1.01383</b> | <b>1.01041</b> | <b>1.01725</b> | <b>^</b> | <b>0.00172</b> | <b>7.97988</b>   | <b>&lt;0.001</b> |
| <b>country</b>                    | <b>0.29621</b> | <b>0.27837</b> | <b>0.31520</b> | <b>v</b> | <b>0.03170</b> | <b>-38.38079</b> | <b>&lt;0.001</b> |
| parity(2nd)                       | 1.00510        | 0.97816        | 1.03279        | .        | 0.01386        | 0.36724          | 0.713            |
| parity(3rd)                       | 1.02207        | 0.98213        | 1.06363        | .        | 0.02034        | 1.07328          | 0.283            |
| parity(4+)                        | 0.97226        | 0.91423        | 1.03397        | .        | 0.03140        | -0.89608         | 0.370            |
| <b>region Sjælland</b>            | <b>0.74552</b> | <b>0.71858</b> | <b>0.77346</b> | <b>v</b> | <b>0.01878</b> | <b>-15.64124</b> | <b>&lt;0.001</b> |
| <b>region Syddanmark</b>          | <b>0.78383</b> | <b>0.75909</b> | <b>0.80938</b> | <b>v</b> | <b>0.01636</b> | <b>-14.88348</b> | <b>&lt;0.001</b> |
| <b>region Midtjylland</b>         | <b>0.87541</b> | <b>0.84868</b> | <b>0.90297</b> | <b>v</b> | <b>0.01582</b> | <b>-8.41207</b>  | <b>&lt;0.001</b> |
| <b>region Nordjylland</b>         | <b>0.43912</b> | <b>0.41773</b> | <b>0.46160</b> | <b>v</b> | <b>0.02548</b> | <b>-32.30421</b> | <b>&lt;0.001</b> |

Supplementary Material – Figures and Tables

**Table S10.** Risk of schizophrenia by birth weight (a) and length (b).

| schizophrenia [DF20]              |                |                |                |      |                |                  |                  |
|-----------------------------------|----------------|----------------|----------------|------|----------------|------------------|------------------|
| (a) birth weight (BW)             |                |                |                |      |                |                  |                  |
|                                   | exp(coef)      | LCL            | UCL            | risk | SE             | Z                | Pr(Z)            |
| <b>BW group 1</b>                 | <b>1.35606</b> | <b>1.08041</b> | <b>1.70202</b> | ▲    | <b>0.11594</b> | <b>2.62706</b>   | <b>0.009</b>     |
| <b>BW group 2</b>                 | <b>1.30665</b> | <b>1.17257</b> | <b>1.45605</b> | ▲    | <b>0.05524</b> | <b>4.84205</b>   | <b>&lt;0.001</b> |
| BW group 3                        | 1.05014        | 0.96768        | 1.13963        | .    | 0.04173        | 1.17250          | 0.241            |
| BW group 4                        | 1.00923        | 0.92112        | 1.10576        | .    | 0.04661        | 0.19703          | 0.844            |
| BW group 5                        | 0.96324        | 0.83141        | 1.11597        | .    | 0.07509        | -0.49873         | 0.618            |
| BW group 6                        | 0.97549        | 0.73537        | 1.29401        | .    | 0.14417        | -0.17215         | 0.863            |
| <b>maternal disorder</b>          | <b>4.66464</b> | <b>3.84049</b> | <b>5.66565</b> | ▲    | <b>0.09919</b> | <b>15.52568</b>  | <b>&lt;0.001</b> |
| <b>paternal disorder</b>          | <b>3.07288</b> | <b>2.44636</b> | <b>3.85985</b> | ▲    | <b>0.11634</b> | <b>9.64975</b>   | <b>&lt;0.001</b> |
| <b>paternal age</b>               | <b>1.72843</b> | <b>1.04172</b> | <b>2.86782</b> | ▲    | <b>0.25834</b> | <b>2.11817</b>   | <b>0.034</b>     |
| <b>maternal age</b>               | <b>0.30879</b> | <b>0.16876</b> | <b>0.56501</b> | ▼    | <b>0.30826</b> | <b>-3.81199</b>  | <b>&lt;0.001</b> |
| preexisting hypertension          | 0.79189        | 0.29631        | 2.11637        | .    | 0.50155        | -0.46521         | 0.642            |
| preexisting diabetes              | 1.24760        | 0.74881        | 2.07865        | .    | 0.26046        | 0.84935          | 0.396            |
| <b>previous abortion (induc.)</b> | <b>1.24457</b> | <b>1.15258</b> | <b>1.34390</b> | ▲    | <b>0.03918</b> | <b>5.58446</b>   | <b>&lt;0.001</b> |
| previous abortion (spont.)        | 1.03345        | 0.94532        | 1.12979        | .    | 0.04548        | 0.72350          | 0.469            |
| education level                   | 1.02319        | 0.99978        | 1.04715        | .    | 0.01181        | 1.94151          | 0.052            |
| <b>average income</b>             | <b>0.84589</b> | <b>0.83457</b> | <b>0.85737</b> | ▼    | <b>0.00688</b> | <b>-24.34005</b> | <b>&lt;0.001</b> |
| gestation length                  | 0.99602        | 0.97666        | 1.01576        | .    | 0.01001        | -0.39826         | 0.690            |
| <b>maternal bleeding</b>          | <b>1.25826</b> | <b>1.12577</b> | <b>1.40635</b> | ▲    | <b>0.05677</b> | <b>4.04680</b>   | <b>&lt;0.001</b> |
| fetal oxygen deprivation          | 1.32218        | 0.73019        | 2.39411        | .    | 0.30293        | 0.92193          | 0.357            |
| pregnancy oedema                  | 1.04773        | 0.81407        | 1.34847        | .    | 0.12875        | 0.36218          | 0.717            |
| gestational diabetes              | -              | -              | -              | -    | -              | -                | -                |
| gestational hypertension          | 1.06820        | 0.91881        | 1.24188        | .    | 0.07686        | 0.85835          | 0.391            |
| APGAR5 score                      | 1.00746        | 0.91236        | 1.11249        | .    | 0.05059        | 0.14700          | 0.883            |
| <b>sex</b>                        | <b>0.79037</b> | <b>0.74073</b> | <b>0.84333</b> | ▼    | <b>0.03310</b> | <b>-7.10844</b>  | <b>&lt;0.001</b> |
| <b>birth year cohort</b>          | <b>1.17967</b> | <b>1.14353</b> | <b>1.21695</b> | ▲    | <b>0.01587</b> | <b>10.40943</b>  | <b>&lt;0.001</b> |
| birth season                      | 1.00438        | 0.99495        | 1.01390        | .    | 0.00481        | 0.90837          | 0.364            |
| <b>country</b>                    | <b>0.74043</b> | <b>0.63508</b> | <b>0.86326</b> | ▼    | <b>0.07831</b> | <b>-3.83768</b>  | <b>&lt;0.001</b> |
| parity(2nd)                       | 1.00968        | 0.93520        | 1.09009        | .    | 0.03910        | 0.24638          | 0.805            |
| <b>parity(3rd)</b>                | <b>1.14204</b> | <b>1.02168</b> | <b>1.27657</b> | ▲    | <b>0.05682</b> | <b>2.33753</b>   | <b>0.019</b>     |
| <b>parity(4+)</b>                 | <b>1.20527</b> | <b>1.02196</b> | <b>1.42146</b> | ▲    | <b>0.08418</b> | <b>2.21799</b>   | <b>0.027</b>     |
| <b>region Sjælland</b>            | <b>0.64452</b> | <b>0.57941</b> | <b>0.71695</b> | ▼    | <b>0.05433</b> | <b>-8.08410</b>  | <b>&lt;0.001</b> |
| <b>region Syddanmark</b>          | <b>0.82087</b> | <b>0.75297</b> | <b>0.89489</b> | ▼    | <b>0.04405</b> | <b>-4.48113</b>  | <b>&lt;0.001</b> |
| <b>region Midtjylland</b>         | <b>0.69860</b> | <b>0.63837</b> | <b>0.76450</b> | ▼    | <b>0.04600</b> | <b>-7.79791</b>  | <b>&lt;0.001</b> |
| <b>region Nordjylland</b>         | <b>0.54883</b> | <b>0.48469</b> | <b>0.62145</b> | ▼    | <b>0.06341</b> | <b>-9.46209</b>  | <b>&lt;0.001</b> |

(b) birth length (BL)

|                   | exp(coef)      | LCL            | UCL            | risk | SE             | Z              | Pr(Z)            |
|-------------------|----------------|----------------|----------------|------|----------------|----------------|------------------|
| <b>BL group 1</b> | <b>1.45106</b> | <b>1.23507</b> | <b>1.70483</b> | ▲    | <b>0.08223</b> | <b>4.52749</b> | <b>&lt;0.001</b> |
| <b>BL group 2</b> | <b>1.30992</b> | <b>1.17407</b> | <b>1.46149</b> | ▲    | <b>0.05586</b> | <b>4.83248</b> | <b>&lt;0.001</b> |
| <b>BL group 3</b> | <b>1.09036</b> | <b>1.00307</b> | <b>1.18525</b> | ▲    | <b>0.04257</b> | <b>2.03198</b> | <b>0.042</b>     |
| BL group 4        | 1.03936        | 0.93962        | 1.14970        | .    | 0.05147        | 0.75008        | 0.453            |
| BL group 5        | 1.00989        | 0.88664        | 1.15027        | .    | 0.06641        | 0.14821        | 0.882            |
| BL group 6        | 0.97950        | 0.77169        | 1.24327        | .    | 0.12167        | -0.17027       | 0.865            |

*Supplementary Material – Figures and Tables*

|                                   |                |                |                |          |                |                  |                  |
|-----------------------------------|----------------|----------------|----------------|----------|----------------|------------------|------------------|
| <b>maternal disorder</b>          | <b>4.72989</b> | <b>3.89058</b> | <b>5.75028</b> | <b>▲</b> | <b>0.09967</b> | <b>15.59081</b>  | <b>&lt;0.001</b> |
| <b>paternal disorder</b>          | <b>3.03313</b> | <b>2.40753</b> | <b>3.82128</b> | <b>▲</b> | <b>0.11786</b> | <b>9.41489</b>   | <b>&lt;0.001</b> |
| <b>paternal age</b>               | <b>1.67989</b> | <b>1.00791</b> | <b>2.79987</b> | <b>▲</b> | <b>0.26064</b> | <b>1.99019</b>   | <b>0.047</b>     |
| <b>maternal age</b>               | <b>0.30939</b> | <b>0.16817</b> | <b>0.56919</b> | <b>▼</b> | <b>0.31104</b> | <b>-3.77182</b>  | <b>&lt;0.001</b> |
| preexisting hypertension          | 0.82600        | 0.30905        | 2.20764        | .        | 0.50158        | -0.38111         | 0.703            |
| preexisting diabetes              | 1.31473        | 0.78995        | 2.18813        | .        | 0.25991        | 1.05280          | 0.292            |
| <b>previous abortion (induc.)</b> | <b>1.24499</b> | <b>1.15234</b> | <b>1.34509</b> | <b>▲</b> | <b>0.03946</b> | <b>5.55347</b>   | <b>&lt;0.001</b> |
| previous abortion (spont.)        | 1.03948        | 0.95038        | 1.13693        | .        | 0.04572        | 0.84692          | 0.397            |
| education level                   | 1.02324        | 0.99968        | 1.04736        | .        | 0.01189        | 1.93279          | 0.053            |
| <b>average income</b>             | <b>0.84786</b> | <b>0.83643</b> | <b>0.85945</b> | <b>▼</b> | <b>0.00693</b> | <b>-23.82766</b> | <b>&lt;0.001</b> |
| gestation length                  | 1.00457        | 0.98437        | 1.02518        | .        | 0.01036        | 0.43981          | 0.660            |
| <b>maternal bleeding</b>          | <b>1.26389</b> | <b>1.12946</b> | <b>1.41433</b> | <b>▲</b> | <b>0.05738</b> | <b>4.08183</b>   | <b>&lt;0.001</b> |
| fetal oxygen deprivation          | 1.22828        | 0.65909        | 2.28900        | .        | 0.31761        | 0.64738          | 0.517            |
| pregnancy oedema                  | 1.05922        | 0.82303        | 1.36318        | .        | 0.12872        | 0.44693          | 0.655            |
| gestational diabetes              | -              | -              | -              | -        | -              | -                | -                |
| gestational hypertension          | 1.06762        | 0.91653        | 1.24363        | .        | 0.07786        | 0.84045          | 0.401            |
| APGAR5 score                      | 1.01944        | 0.91793        | 1.13217        | .        | 0.05351        | 0.35979          | 0.719            |
| <b>sex</b>                        | <b>0.78264</b> | <b>0.73279</b> | <b>0.83589</b> | <b>▼</b> | <b>0.03358</b> | <b>-7.29738</b>  | <b>&lt;0.001</b> |
| <b>birth year cohort</b>          | <b>1.17860</b> | <b>1.14231</b> | <b>1.21605</b> | <b>▲</b> | <b>0.01596</b> | <b>10.29774</b>  | <b>&lt;0.001</b> |
| birth season                      | 1.00423        | 0.99473        | 1.01381        | .        | 0.00485        | 0.86998          | 0.384            |
| <b>country</b>                    | <b>0.75424</b> | <b>0.64653</b> | <b>0.87991</b> | <b>▼</b> | <b>0.07863</b> | <b>-3.58708</b>  | <b>&lt;0.001</b> |
| parity(2nd)                       | 1.00517        | 0.93068        | 1.08563        | .        | 0.03929        | 0.13136          | 0.895            |
| <b>parity(3rd)</b>                | <b>1.15442</b> | <b>1.03252</b> | <b>1.29071</b> | <b>▲</b> | <b>0.05694</b> | <b>2.52205</b>   | <b>0.012</b>     |
| <b>parity(4+)</b>                 | <b>1.22356</b> | <b>1.03704</b> | <b>1.44362</b> | <b>▲</b> | <b>0.08438</b> | <b>2.39100</b>   | <b>0.017</b>     |
| <b>region Sjælland</b>            | <b>0.64167</b> | <b>0.57619</b> | <b>0.71459</b> | <b>▼</b> | <b>0.05492</b> | <b>-8.07939</b>  | <b>&lt;0.001</b> |
| <b>region Syddanmark</b>          | <b>0.82805</b> | <b>0.75900</b> | <b>0.90339</b> | <b>▼</b> | <b>0.04443</b> | <b>-4.24680</b>  | <b>&lt;0.001</b> |
| <b>region Midtjylland</b>         | <b>0.69778</b> | <b>0.63714</b> | <b>0.76419</b> | <b>▼</b> | <b>0.04639</b> | <b>-7.75774</b>  | <b>&lt;0.001</b> |
| <b>region Nordjylland</b>         | <b>0.55010</b> | <b>0.48544</b> | <b>0.62337</b> | <b>▼</b> | <b>0.06380</b> | <b>-9.36810</b>  | <b>&lt;0.001</b> |

Supplementary Material – Figures and Tables

**Table S11.** Risk of schizophrenia-schizotypal-delusional disorders by birth weight (a) and length (b).

| schizophrenia-schizotypal-delusional disorders [DF20-29] |                |                |                |      |                |                  |                  |
|----------------------------------------------------------|----------------|----------------|----------------|------|----------------|------------------|------------------|
| (a) birth weight (BW)                                    |                |                |                |      |                |                  |                  |
|                                                          | exp(coef)      | LCL            | UCL            | risk | SE             | Z                | Pr(Z)            |
| <b>BW group 1</b>                                        | <b>1.56126</b> | <b>1.32727</b> | <b>1.83650</b> | ▲    | <b>0.08284</b> | <b>5.37756</b>   | <b>&lt;0.001</b> |
| <b>BW group 2</b>                                        | <b>1.23269</b> | <b>1.13290</b> | <b>1.34126</b> | ▲    | <b>0.04307</b> | <b>4.85703</b>   | <b>&lt;0.001</b> |
| BW group 3                                               | 1.05105        | 0.98766        | 1.11851        | .    | 0.03174        | 1.56872          | 0.117            |
| BW group 4                                               | 0.96605        | 0.90056        | 1.03631        | .    | 0.03582        | -0.96431         | 0.335            |
| BW group 5                                               | 0.96002        | 0.85904        | 1.07288        | .    | 0.05671        | -0.71950         | 0.472            |
| BW group 6                                               | 0.98936        | 0.80134        | 1.22149        | .    | 0.10754        | -0.09949         | 0.921            |
| <b>maternal disorder</b>                                 | <b>3.44242</b> | <b>3.05468</b> | <b>3.87937</b> | ▲    | <b>0.06097</b> | <b>20.27497</b>  | <b>&lt;0.001</b> |
| <b>paternal disorder</b>                                 | <b>2.48939</b> | <b>2.15829</b> | <b>2.87129</b> | ▲    | <b>0.07282</b> | <b>12.52466</b>  | <b>&lt;0.001</b> |
| <b>paternal age</b>                                      | <b>1.95571</b> | <b>1.32871</b> | <b>2.87859</b> | ▲    | <b>0.19722</b> | <b>3.40102</b>   | <b>0.001</b>     |
| <b>maternal age</b>                                      | <b>0.33730</b> | <b>0.21246</b> | <b>0.53549</b> | ▼    | <b>0.23583</b> | <b>-4.60832</b>  | <b>&lt;0.001</b> |
| preexisting hypertension                                 | 0.76420        | 0.36345        | 1.60685        | .    | 0.37919        | -0.70920         | 0.478            |
| preexisting diabetes                                     | 1.22762        | 0.83295        | 1.80931        | .    | 0.19790        | 1.03631          | 0.300            |
| <b>previous abortion (induc.)</b>                        | <b>1.23364</b> | <b>1.16374</b> | <b>1.30774</b> | ▲    | <b>0.02976</b> | <b>7.05525</b>   | <b>&lt;0.001</b> |
| previous abortion (spont.)                               | 1.01475        | 0.94782        | 1.08641        | .    | 0.03482        | 0.42055          | 0.674            |
| education level                                          | 1.01740        | 0.99950        | 1.03562        | .    | 0.00906        | 1.90423          | 0.057            |
| <b>average income</b>                                    | <b>0.85619</b> | <b>0.84739</b> | <b>0.86509</b> | ▼    | <b>0.00527</b> | <b>-29.43375</b> | <b>&lt;0.001</b> |
| gestation length                                         | 0.98941        | 0.97482        | 1.00422        | .    | 0.00758        | -1.40420         | 0.160            |
| <b>maternal bleeding</b>                                 | <b>1.20674</b> | <b>1.10748</b> | <b>1.31489</b> | ▲    | <b>0.04379</b> | <b>4.29101</b>   | <b>&lt;0.001</b> |
| fetal oxygen deprivation                                 | 1.01815        | 0.59012        | 1.75665        | .    | 0.27828        | 0.06464          | 0.948            |
| pregnancy oedema                                         | 1.05407        | 0.86420        | 1.28564        | .    | 0.10133        | 0.51964          | 0.603            |
| gestational diabetes                                     | -              | -              | -              | -    | -              | -                | -                |
| gestational hypertension                                 | 1.06351        | 0.94682        | 1.19459        | .    | 0.05930        | 1.03837          | 0.299            |
| APGAR5 score                                             | 0.98550        | 0.91563        | 1.06071        | .    | 0.03752        | -0.38916         | 0.697            |
| <b>sex</b>                                               | <b>0.83996</b> | <b>0.79952</b> | <b>0.88245</b> | ▼    | <b>0.02518</b> | <b>-6.92697</b>  | <b>&lt;0.001</b> |
| <b>birth year cohort</b>                                 | <b>1.22701</b> | <b>1.20007</b> | <b>1.25454</b> | ▲    | <b>0.01132</b> | <b>18.06751</b>  | <b>&lt;0.001</b> |
| birth season                                             | 1.00648        | 0.99925        | 1.01376        | .    | 0.00368        | 1.75712          | 0.079            |
| <b>country</b>                                           | <b>0.62743</b> | <b>0.55592</b> | <b>0.70814</b> | ▼    | <b>0.06174</b> | <b>-7.54938</b>  | <b>&lt;0.001</b> |
| parity(2nd)                                              | 1.01090        | 0.95360        | 1.07165        | .    | 0.02977        | 0.36423          | 0.716            |
| <b>parity(3rd)</b>                                       | <b>1.14109</b> | <b>1.04839</b> | <b>1.24198</b> | ▲    | <b>0.04323</b> | <b>3.05315</b>   | <b>0.002</b>     |
| <b>parity(4+)</b>                                        | <b>1.14799</b> | <b>1.00985</b> | <b>1.30502</b> | ▲    | <b>0.06541</b> | <b>2.10985</b>   | <b>0.035</b>     |
| <b>region Sjælland</b>                                   | <b>0.64657</b> | <b>0.59809</b> | <b>0.69899</b> | ▼    | <b>0.03977</b> | <b>-10.96443</b> | <b>&lt;0.001</b> |
| <b>region Syddanmark</b>                                 | <b>0.71102</b> | <b>0.66568</b> | <b>0.75945</b> | ▼    | <b>0.03362</b> | <b>-10.14452</b> | <b>&lt;0.001</b> |
| <b>region Midtjylland</b>                                | <b>0.58496</b> | <b>0.54553</b> | <b>0.62725</b> | ▼    | <b>0.03561</b> | <b>-15.05710</b> | <b>&lt;0.001</b> |
| <b>region Nordjylland</b>                                | <b>0.48317</b> | <b>0.43899</b> | <b>0.53181</b> | ▼    | <b>0.04893</b> | <b>-14.86476</b> | <b>&lt;0.001</b> |
| (b) birth length (BL)                                    |                |                |                |      |                |                  |                  |
|                                                          | exp(coef)      | LCL            | UCL            | risk | SE             | Z                | Pr(Z)            |
| <b>BL group 1</b>                                        | <b>1.47165</b> | <b>1.30196</b> | <b>1.66346</b> | ▲    | <b>0.06251</b> | <b>6.18119</b>   | <b>&lt;0.001</b> |
| <b>BL group 2</b>                                        | <b>1.26039</b> | <b>1.15813</b> | <b>1.37167</b> | ▲    | <b>0.04317</b> | <b>5.36048</b>   | <b>&lt;0.001</b> |
| <b>BL group 3</b>                                        | <b>1.08074</b> | <b>1.01405</b> | <b>1.15183</b> | ▲    | <b>0.03250</b> | <b>2.38912</b>   | <b>0.017</b>     |
| BL group 4                                               | 1.02682        | 0.95085        | 1.10885        | .    | 0.03922        | 0.67486          | 0.500            |
| BL group 5                                               | 0.98884        | 0.89517        | 1.09231        | .    | 0.05077        | -0.22105         | 0.825            |

*Supplementary Material – Figures and Tables*

|                                   |                |                |                |          |                |                  |                  |
|-----------------------------------|----------------|----------------|----------------|----------|----------------|------------------|------------------|
| BL group 6                        | 0.99501        | 0.83193        | 1.19006        | .        | 0.09133        | -0.05481         | 0.956            |
| <b>maternal disorder</b>          | <b>3.44554</b> | <b>3.05377</b> | <b>3.88757</b> | <b>▲</b> | <b>0.06158</b> | <b>20.08757</b>  | <b>&lt;0.001</b> |
| <b>paternal disorder</b>          | <b>2.48498</b> | <b>2.15212</b> | <b>2.86933</b> | <b>▲</b> | <b>0.07337</b> | <b>12.40577</b>  | <b>&lt;0.001</b> |
| <b>paternal age</b>               | <b>1.89907</b> | <b>1.28563</b> | <b>2.80523</b> | <b>▲</b> | <b>0.19904</b> | <b>3.22222</b>   | <b>0.001</b>     |
| <b>maternal age</b>               | <b>0.33440</b> | <b>0.20972</b> | <b>0.53319</b> | <b>▼</b> | <b>0.23804</b> | <b>-4.60186</b>  | <b>&lt;0.001</b> |
| preexisting hypertension          | 0.80623        | 0.38342        | 1.69530        | .        | 0.37921        | -0.56798         | 0.570            |
| preexisting diabetes              | 1.29199        | 0.87741        | 1.90245        | .        | 0.19743        | 1.29757          | 0.194            |
| <b>previous abortion (induc.)</b> | <b>1.23534</b> | <b>1.16483</b> | <b>1.31011</b> | <b>▲</b> | <b>0.02998</b> | <b>7.04844</b>   | <b>&lt;0.001</b> |
| previous abortion (spont.)        | 1.02363        | 0.95575        | 1.09633        | .        | 0.03501        | 0.66714          | 0.505            |
| education level                   | 1.01666        | 0.99864        | 1.03500        | .        | 0.00912        | 1.81049          | 0.070            |
| <b>average income</b>             | <b>0.85663</b> | <b>0.84775</b> | <b>0.86560</b> | <b>▼</b> | <b>0.00532</b> | <b>-29.10475</b> | <b>&lt;0.001</b> |
| gestation length                  | 0.99625        | 0.98105        | 1.01169        | .        | 0.00784        | -0.47872         | 0.632            |
| <b>maternal bleeding</b>          | <b>1.21628</b> | <b>1.11527</b> | <b>1.32643</b> | <b>▲</b> | <b>0.04423</b> | <b>4.42646</b>   | <b>&lt;0.001</b> |
| fetal oxygen deprivation          | 0.96381        | 0.54638        | 1.70015        | .        | 0.28958        | -0.12728         | 0.899            |
| pregnancy oedema                  | 1.04089        | 0.85176        | 1.27203        | .        | 0.10231        | 0.39174          | 0.695            |
| gestational diabetes              | -              | -              | -              | -        | -              | -                | -                |
| gestational hypertension          | 1.04425        | 0.92729        | 1.17597        | .        | 0.06061        | 0.71442          | 0.475            |
| APGAR5 score                      | 0.99169        | 0.91758        | 1.07179        | .        | 0.03963        | -0.21053         | 0.833            |
| <b>sex</b>                        | <b>0.83337</b> | <b>0.79262</b> | <b>0.87621</b> | <b>▼</b> | <b>0.02558</b> | <b>-7.12699</b>  | <b>&lt;0.001</b> |
| <b>birth year cohort</b>          | <b>1.22409</b> | <b>1.19709</b> | <b>1.25171</b> | <b>▲</b> | <b>0.01138</b> | <b>17.76329</b>  | <b>&lt;0.001</b> |
| birth season                      | 1.00652        | 0.99923        | 1.01386        | .        | 0.00371        | 1.75303          | 0.080            |
| <b>country</b>                    | <b>0.63206</b> | <b>0.55953</b> | <b>0.71400</b> | <b>▼</b> | <b>0.06219</b> | <b>-7.37681</b>  | <b>&lt;0.001</b> |
| parity(2nd)                       | 1.00600        | 0.94871        | 1.06675        | .        | 0.02992        | 0.19996          | 0.842            |
| <b>parity(3rd)</b>                | <b>1.14593</b> | <b>1.05252</b> | <b>1.24762</b> | <b>▲</b> | <b>0.04338</b> | <b>3.13986</b>   | <b>0.002</b>     |
| <b>parity(4+)</b>                 | <b>1.14843</b> | <b>1.00945</b> | <b>1.30655</b> | <b>▲</b> | <b>0.06581</b> | <b>2.10283</b>   | <b>0.035</b>     |
| <b>region Sjælland</b>            | <b>0.64728</b> | <b>0.59827</b> | <b>0.70032</b> | <b>▼</b> | <b>0.04018</b> | <b>-10.82647</b> | <b>&lt;0.001</b> |
| <b>region Syddanmark</b>          | <b>0.71664</b> | <b>0.67051</b> | <b>0.76595</b> | <b>▼</b> | <b>0.03395</b> | <b>-9.81466</b>  | <b>&lt;0.001</b> |
| <b>region Midtjylland</b>         | <b>0.58593</b> | <b>0.54609</b> | <b>0.62867</b> | <b>▼</b> | <b>0.03592</b> | <b>-14.88123</b> | <b>&lt;0.001</b> |
| <b>region Nordjylland</b>         | <b>0.48353</b> | <b>0.43901</b> | <b>0.53256</b> | <b>▼</b> | <b>0.04928</b> | <b>-14.74501</b> | <b>&lt;0.001</b> |

*Supplementary Material – Figures and Tables*

**Table S12.** Risk of schizophrenia-spectrum disorders by birth weight (a) and length (b).

| schizophrenia-spectrum disorders (schizophrenia, bipolar, depression) [DF20, DF30, DF31, DF32, DF33] |                |                |                |      |                |                  |                  |
|------------------------------------------------------------------------------------------------------|----------------|----------------|----------------|------|----------------|------------------|------------------|
| (a) birth weight (BW)                                                                                |                |                |                |      |                |                  |                  |
|                                                                                                      | exp(coef)      | LCL            | UCL            | risk | SE             | Z                | Pr(Z)            |
| <b>BW group 1</b>                                                                                    | <b>1.24943</b> | <b>1.12968</b> | <b>1.38187</b> | ▲    | <b>0.05140</b> | <b>4.33200</b>   | <b>&lt;0.001</b> |
| <b>BW group 2</b>                                                                                    | <b>1.20764</b> | <b>1.15154</b> | <b>1.26647</b> | ▲    | <b>0.02427</b> | <b>7.77373</b>   | <b>&lt;0.001</b> |
| <b>BW group 3</b>                                                                                    | <b>1.08391</b> | <b>1.04705</b> | <b>1.12207</b> | ▲    | <b>0.01765</b> | <b>4.56437</b>   | <b>&lt;0.001</b> |
| <b>BW group 4</b>                                                                                    | <b>0.94359</b> | <b>0.90681</b> | <b>0.98186</b> | ▼    | <b>0.02029</b> | <b>-2.86235</b>  | <b>0.004</b>     |
| BW group 5                                                                                           | 0.94664        | 0.88884        | 1.00819        | .    | 0.03214        | -1.70613         | 0.088            |
| BW group 6                                                                                           | 0.90459        | 0.79908        | 1.02403        | .    | 0.06327        | -1.58471         | 0.113            |
| <b>maternal disorder</b>                                                                             | <b>2.35992</b> | <b>2.24975</b> | <b>2.47549</b> | ▲    | <b>0.02439</b> | <b>35.19943</b>  | <b>&lt;0.001</b> |
| <b>paternal disorder</b>                                                                             | <b>1.96426</b> | <b>1.85311</b> | <b>2.08207</b> | ▲    | <b>0.02972</b> | <b>22.71652</b>  | <b>&lt;0.001</b> |
| <b>paternal age</b>                                                                                  | <b>1.27718</b> | <b>1.01624</b> | <b>1.60512</b> | ▲    | <b>0.11661</b> | <b>2.09813</b>   | <b>0.036</b>     |
| <b>maternal age</b>                                                                                  | <b>0.39985</b> | <b>0.30498</b> | <b>0.52423</b> | ▼    | <b>0.13818</b> | <b>-6.63373</b>  | <b>&lt;0.001</b> |
| preexisting hypertension                                                                             | 1.26347        | 0.91389        | 1.74676        | .    | 0.16526        | 1.41511          | 0.157            |
| preexisting diabetes                                                                                 | 1.04632        | 0.82879        | 1.32095        | .    | 0.11892        | 0.38078          | 0.703            |
| <b>previous abortion (induc.)</b>                                                                    | <b>1.16833</b> | <b>1.12965</b> | <b>1.20834</b> | ▲    | <b>0.01718</b> | <b>9.05531</b>   | <b>&lt;0.001</b> |
| <b>previous abortion (spont.)</b>                                                                    | <b>1.06022</b> | <b>1.02082</b> | <b>1.10114</b> | ▲    | <b>0.01932</b> | <b>3.02627</b>   | <b>0.002</b>     |
| education level                                                                                      | 1.00622        | 0.99605        | 1.01649        | .    | 0.00518        | 1.19575          | 0.232            |
| <b>average income</b>                                                                                | <b>0.91012</b> | <b>0.90474</b> | <b>0.91554</b> | ▼    | <b>0.00303</b> | <b>-31.13109</b> | <b>&lt;0.001</b> |
| <b>gestation length</b>                                                                              | <b>0.99137</b> | <b>0.98295</b> | <b>0.99986</b> | ▼    | <b>0.00435</b> | <b>-1.99143</b>  | <b>0.046</b>     |
| <b>maternal bleeding</b>                                                                             | <b>1.18012</b> | <b>1.12320</b> | <b>1.23993</b> | ▲    | <b>0.02522</b> | <b>6.56595</b>   | <b>&lt;0.001</b> |
| fetal oxygen deprivation                                                                             | 1.07838        | 0.81871        | 1.42041        | .    | 0.14056        | 0.53685          | 0.591            |
| pregnancy oedema                                                                                     | 1.03296        | 0.92163        | 1.15774        | .    | 0.05819        | 0.55728          | 0.577            |
| gestational diabetes                                                                                 | -              | -              | -              | -    | -              | -                | -                |
| gestational hypertension                                                                             | 1.06549        | 0.99805        | 1.13749        | .    | 0.03336        | 1.90147          | 0.057            |
| APGAR5 score                                                                                         | 0.96367        | 0.92452        | 1.00449        | .    | 0.02116        | -1.74845         | 0.080            |
| <b>sex</b>                                                                                           | <b>1.94422</b> | <b>1.88915</b> | <b>2.00088</b> | ▲    | <b>0.01466</b> | <b>45.35682</b>  | <b>&lt;0.001</b> |
| <b>birth year cohort</b>                                                                             | <b>1.39167</b> | <b>1.37338</b> | <b>1.41021</b> | ▲    | <b>0.00675</b> | <b>48.95076</b>  | <b>&lt;0.001</b> |
| <b>birth season</b>                                                                                  | <b>1.01141</b> | <b>1.00731</b> | <b>1.01552</b> | ▲    | <b>0.00207</b> | <b>5.47649</b>   | <b>&lt;0.001</b> |
| <b>country</b>                                                                                       | <b>0.44582</b> | <b>0.40780</b> | <b>0.48738</b> | ▼    | <b>0.04548</b> | <b>-17.76383</b> | <b>&lt;0.001</b> |
| <b>parity(2nd)</b>                                                                                   | <b>1.05043</b> | <b>1.01670</b> | <b>1.08528</b> | ▲    | <b>0.01665</b> | <b>2.95466</b>   | <b>0.003</b>     |
| <b>parity(3rd)</b>                                                                                   | <b>1.13778</b> | <b>1.08435</b> | <b>1.19384</b> | ▲    | <b>0.02454</b> | <b>5.26009</b>   | <b>&lt;0.001</b> |
| <b>parity(4+)</b>                                                                                    | <b>1.20475</b> | <b>1.11835</b> | <b>1.29782</b> | ▲    | <b>0.03797</b> | <b>4.90590</b>   | <b>&lt;0.001</b> |
| <b>region Sjælland</b>                                                                               | <b>0.78106</b> | <b>0.74589</b> | <b>0.81789</b> | ▼    | <b>0.02351</b> | <b>-10.51106</b> | <b>&lt;0.001</b> |
| <b>region Syddanmark</b>                                                                             | <b>0.93073</b> | <b>0.89571</b> | <b>0.96712</b> | ▼    | <b>0.01957</b> | <b>-3.66822</b>  | <b>&lt;0.001</b> |
| region Midtjylland                                                                                   | 0.97794        | 0.94175        | 1.01552        | .    | 0.01924        | -1.15933         | 0.246            |
| <b>region Nordjylland</b>                                                                            | <b>0.59258</b> | <b>0.56043</b> | <b>0.62657</b> | ▼    | <b>0.02846</b> | <b>-18.38562</b> | <b>&lt;0.001</b> |

**(b) birth length (BL)**

|                   | exp(coef)      | LCL            | UCL            | risk | SE             | Z               | Pr(Z)            |
|-------------------|----------------|----------------|----------------|------|----------------|-----------------|------------------|
| <b>BL group 1</b> | <b>1.33509</b> | <b>1.24373</b> | <b>1.43316</b> | ▲    | <b>0.03617</b> | <b>7.99098</b>  | <b>&lt;0.001</b> |
| <b>BL group 2</b> | <b>1.23563</b> | <b>1.17848</b> | <b>1.29556</b> | ▲    | <b>0.02416</b> | <b>8.75685</b>  | <b>&lt;0.001</b> |
| <b>BL group 3</b> | <b>1.12218</b> | <b>1.08349</b> | <b>1.16225</b> | ▲    | <b>0.01790</b> | <b>6.43962</b>  | <b>&lt;0.001</b> |
| <b>BL group 4</b> | <b>0.94278</b> | <b>0.90214</b> | <b>0.98526</b> | ▼    | <b>0.02248</b> | <b>-2.62056</b> | <b>0.009</b>     |

*Supplementary Material – Figures and Tables*

|                                   |                |                |                |          |                |                  |                  |
|-----------------------------------|----------------|----------------|----------------|----------|----------------|------------------|------------------|
| <b>BL group 5</b>                 | <b>0.87522</b> | <b>0.82570</b> | <b>0.92771</b> | <b>∇</b> | <b>0.02972</b> | <b>-4.48509</b>  | <b>&lt;0.001</b> |
| <b>BL group 6</b>                 | <b>0.82848</b> | <b>0.74299</b> | <b>0.92381</b> | <b>∇</b> | <b>0.05557</b> | <b>-3.38618</b>  | <b>0.001</b>     |
| <b>maternal disorder</b>          | <b>2.36861</b> | <b>2.25734</b> | <b>2.48537</b> | <b>∧</b> | <b>0.02455</b> | <b>35.12525</b>  | <b>&lt;0.001</b> |
| <b>paternal disorder</b>          | <b>1.95523</b> | <b>1.84368</b> | <b>2.07353</b> | <b>∧</b> | <b>0.02997</b> | <b>22.37114</b>  | <b>&lt;0.001</b> |
| <b>paternal age</b>               | <b>1.29411</b> | <b>1.02806</b> | <b>1.62902</b> | <b>∧</b> | <b>0.11743</b> | <b>2.19561</b>   | <b>0.028</b>     |
| <b>maternal age</b>               | <b>0.39086</b> | <b>0.29751</b> | <b>0.51350</b> | <b>∇</b> | <b>0.13924</b> | <b>-6.74682</b>  | <b>&lt;0.001</b> |
| preexisting hypertension          | 1.28088        | 0.92239        | 1.77869        | .        | 0.16752        | 1.47773          | 0.139            |
| preexisting diabetes              | 1.03793        | 0.81573        | 1.32065        | .        | 0.12291        | 0.30287          | 0.762            |
| <b>previous abortion (induc.)</b> | <b>1.17033</b> | <b>1.13133</b> | <b>1.21068</b> | <b>∧</b> | <b>0.01729</b> | <b>9.09554</b>   | <b>&lt;0.001</b> |
| <b>previous abortion (spont.)</b> | <b>1.06355</b> | <b>1.02377</b> | <b>1.10487</b> | <b>∧</b> | <b>0.01945</b> | <b>3.16801</b>   | <b>0.002</b>     |
| education level                   | 1.00642        | 0.99618        | 1.01676        | .        | 0.00522        | 1.22567          | 0.220            |
| <b>average income</b>             | <b>0.91061</b> | <b>0.90519</b> | <b>0.91606</b> | <b>∇</b> | <b>0.00305</b> | <b>-30.74114</b> | <b>&lt;0.001</b> |
| gestation length                  | 0.99418        | 0.98548        | 1.00295        | .        | 0.00448        | -1.30312         | 0.193            |
| <b>maternal bleeding</b>          | <b>1.18647</b> | <b>1.12874</b> | <b>1.24716</b> | <b>∧</b> | <b>0.02545</b> | <b>6.71789</b>   | <b>&lt;0.001</b> |
| fetal oxygen deprivation          | 1.08023        | 0.81788        | 1.42674        | .        | 0.14195        | 0.54369          | 0.587            |
| pregnancy oedema                  | 1.03596        | 0.92381        | 1.16173        | .        | 0.05846        | 0.60436          | 0.546            |
| gestational diabetes              | -              | -              | -              | -        | -              | -                | -                |
| gestational hypertension          | 1.06431        | 0.99607        | 1.13723        | .        | 0.03381        | 1.84340          | 0.065            |
| APGAR5 score                      | 0.97030        | 0.92887        | 1.01358        | .        | 0.02227        | -1.35397         | 0.176            |
| <b>sex</b>                        | <b>1.93203</b> | <b>1.87652</b> | <b>1.98918</b> | <b>∧</b> | <b>0.01487</b> | <b>44.27847</b>  | <b>&lt;0.001</b> |
| <b>birth year cohort</b>          | <b>1.39203</b> | <b>1.37363</b> | <b>1.41067</b> | <b>∧</b> | <b>0.00679</b> | <b>48.72564</b>  | <b>&lt;0.001</b> |
| <b>birth season</b>               | <b>1.01144</b> | <b>1.00732</b> | <b>1.01559</b> | <b>∧</b> | <b>0.00209</b> | <b>5.45689</b>   | <b>&lt;0.001</b> |
| <b>country</b>                    | <b>0.44790</b> | <b>0.40946</b> | <b>0.48996</b> | <b>∇</b> | <b>0.04579</b> | <b>-17.54145</b> | <b>&lt;0.001</b> |
| <b>parity(2nd)</b>                | <b>1.05025</b> | <b>1.01641</b> | <b>1.08521</b> | <b>∧</b> | <b>0.01671</b> | <b>2.93440</b>   | <b>0.003</b>     |
| <b>parity(3rd)</b>                | <b>1.13995</b> | <b>1.08622</b> | <b>1.19634</b> | <b>∧</b> | <b>0.02463</b> | <b>5.31711</b>   | <b>&lt;0.001</b> |
| <b>parity(4+)</b>                 | <b>1.20723</b> | <b>1.12013</b> | <b>1.30109</b> | <b>∧</b> | <b>0.03820</b> | <b>4.92945</b>   | <b>&lt;0.001</b> |
| <b>region Sjælland</b>            | <b>0.78336</b> | <b>0.74778</b> | <b>0.82063</b> | <b>∇</b> | <b>0.02372</b> | <b>-10.29594</b> | <b>&lt;0.001</b> |
| <b>region Syddanmark</b>          | <b>0.93675</b> | <b>0.90117</b> | <b>0.97374</b> | <b>∇</b> | <b>0.01976</b> | <b>-3.30672</b>  | <b>0.001</b>     |
| region Midtjylland                | 0.98254        | 0.94589        | 1.02061        | .        | 0.01940        | -0.90819         | 0.364            |
| <b>region Nordjylland</b>         | <b>0.59521</b> | <b>0.56274</b> | <b>0.62956</b> | <b>∇</b> | <b>0.02862</b> | <b>-18.12584</b> | <b>&lt;0.001</b> |



Supplementary Material – Figures and Tables

**Table S13.** Risk of bipolar disorder by birth weight (a) and length (b).

| bipolar disorder [DF30, DF31]     |                |                |                 |          |                |                 |                  |
|-----------------------------------|----------------|----------------|-----------------|----------|----------------|-----------------|------------------|
| (a) birth weight (BW)             |                |                |                 |          |                |                 |                  |
|                                   | exp(coef)      | LCL            | UCL             | risk     | SE             | Z               | Pr(Z)            |
| BW group 1                        | 1.20767        | 0.78606        | 1.85542         | .        | 0.21909        | 0.86123         | 0.389            |
| BW group 2                        | 1.03530        | 0.83736        | 1.28004         | .        | 0.10827        | 0.32045         | 0.749            |
| BW group 3                        | 1.08836        | 0.94029        | 1.25975         | .        | 0.07461        | 1.13484         | 0.256            |
| BW group 4                        | 1.06123        | 0.90184        | 1.24878         | .        | 0.08303        | 0.71569         | 0.474            |
| BW group 5                        | 0.94880        | 0.72446        | 1.24261         | .        | 0.13764        | -0.38183        | 0.703            |
| BW group 6                        | 0.83638        | 0.48133        | 1.45335         | .        | 0.28191        | -0.63377        | 0.526            |
| <b>maternal disorder</b>          | <b>9.48643</b> | <b>7.36475</b> | <b>12.21933</b> | <b>▲</b> | <b>0.12916</b> | <b>17.41861</b> | <b>&lt;0.001</b> |
| <b>paternal disorder</b>          | <b>6.85014</b> | <b>4.94602</b> | <b>9.48732</b>  | <b>▲</b> | <b>0.16617</b> | <b>11.58015</b> | <b>&lt;0.001</b> |
| paternal age                      | 1.47414        | 0.55035        | 3.94856         | .        | 0.50270        | 0.77198         | 0.440            |
| maternal age                      | 1.89272        | 0.60226        | 5.94825         | .        | 0.58424        | 1.09205         | 0.275            |
| preexisting hypertension          | 0.62585        | 0.08770        | 4.46648         | .        | 1.00269        | -0.46739        | 0.640            |
| preexisting diabetes              | 1.16102        | 0.43202        | 3.12011         | .        | 0.50438        | 0.29599         | 0.767            |
| <b>previous abortion (induc.)</b> | <b>1.34394</b> | <b>1.16833</b> | <b>1.54593</b>  | <b>▲</b> | <b>0.07144</b> | <b>4.13767</b>  | <b>&lt;0.001</b> |
| previous abortion (spont.)        | 1.06715        | 0.90848        | 1.25352         | .        | 0.08213        | 0.79131         | 0.429            |
| <b>education level</b>            | <b>1.09384</b> | <b>1.04824</b> | <b>1.14142</b>  | <b>▲</b> | <b>0.02173</b> | <b>4.12829</b>  | <b>&lt;0.001</b> |
| <b>average income</b>             | <b>0.90669</b> | <b>0.88470</b> | <b>0.92923</b>  | <b>▼</b> | <b>0.01253</b> | <b>-7.81915</b> | <b>&lt;0.001</b> |
| gestation length                  | 0.99519        | 0.95972        | 1.03197         | .        | 0.01851        | -0.26043        | 0.795            |
| maternal bleeding                 | 0.95694        | 0.76051        | 1.20410         | .        | 0.11722        | -0.37549        | 0.707            |
| fetal oxygen deprivation          | 0.55093        | 0.13734        | 2.21000         | .        | 0.70876        | -0.84111        | 0.400            |
| pregnancy oedema                  | 0.67561        | 0.39024        | 1.16966         | .        | 0.28003        | -1.40034        | 0.161            |
| gestational diabetes              | -              | -              | -               | -        | -              | -               | -                |
| gestational hypertension          | 1.05580        | 0.80148        | 1.39082         | .        | 0.14061        | 0.38616         | 0.699            |
| <b>APGAR5 score</b>               | <b>0.81501</b> | <b>0.69674</b> | <b>0.95335</b>  | <b>▼</b> | <b>0.07999</b> | <b>-2.55724</b> | <b>0.011</b>     |
| <b>sex</b>                        | <b>1.70691</b> | <b>1.51535</b> | <b>1.92268</b>  | <b>▲</b> | <b>0.06073</b> | <b>8.80369</b>  | <b>&lt;0.001</b> |
| <b>birth year cohort</b>          | <b>1.32960</b> | <b>1.24861</b> | <b>1.41584</b>  | <b>▲</b> | <b>0.03206</b> | <b>8.88464</b>  | <b>&lt;0.001</b> |
| <b>birth season</b>               | <b>1.01858</b> | <b>1.00123</b> | <b>1.03623</b>  | <b>▲</b> | <b>0.00877</b> | <b>2.10009</b>  | <b>0.036</b>     |
| country                           | 0.84283        | 0.59497        | 1.19395         | .        | 0.17768        | -0.96233        | 0.336            |
| <b>parity(2nd)</b>                | <b>0.81907</b> | <b>0.71365</b> | <b>0.94007</b>  | <b>▼</b> | <b>0.07030</b> | <b>-2.83918</b> | <b>0.005</b>     |
| parity(3rd)                       | 0.86133        | 0.70330        | 1.05487         | .        | 0.10342        | -1.44346        | 0.149            |
| parity(4+)                        | 0.80125        | 0.57695        | 1.11274         | .        | 0.16756        | -1.32241        | 0.186            |
| <b>region Sjælland</b>            | <b>0.80720</b> | <b>0.65327</b> | <b>0.99741</b>  | <b>▼</b> | <b>0.10795</b> | <b>-1.98400</b> | <b>0.047</b>     |
| region Syddanmark                 | 1.10859        | 0.93549        | 1.31372         | .        | 0.08662        | 1.19008         | 0.234            |
| <b>region Midtjylland</b>         | <b>1.44911</b> | <b>1.23780</b> | <b>1.69650</b>  | <b>▲</b> | <b>0.08042</b> | <b>4.61277</b>  | <b>&lt;0.001</b> |
| region Nordjylland                | 0.80772        | 0.64083        | 1.01809         | .        | 0.11809        | -1.80817        | 0.071            |

(b) birth length (BL)

|            | exp(coef) | LCL     | UCL     | risk | SE      | Z        | Pr(Z) |
|------------|-----------|---------|---------|------|---------|----------|-------|
| BL group 1 | 0.72636   | 0.49771 | 1.06006 | .    | 0.19288 | -1.65756 | 0.097 |
| BL group 2 | 1.02718   | 0.83538 | 1.26303 | .    | 0.10546 | 0.25431  | 0.799 |
| BL group 3 | 1.04043   | 0.89945 | 1.20350 | .    | 0.07429 | 0.53351  | 0.594 |
| BL group 4 | 0.88780   | 0.73857 | 1.06717 | .    | 0.09389 | -1.26754 | 0.205 |
| BL group 5 | 0.87448   | 0.68915 | 1.10965 | .    | 0.12152 | -1.10375 | 0.270 |
| BL group 6 | 0.89631   | 0.58295 | 1.37811 | .    | 0.21948 | -0.49877 | 0.618 |

*Supplementary Material – Figures and Tables*

|                                   |                |                |                 |          |                |                 |                  |
|-----------------------------------|----------------|----------------|-----------------|----------|----------------|-----------------|------------------|
| <b>maternal disorder</b>          | <b>9.54507</b> | <b>7.39564</b> | <b>12.31921</b> | <b>▲</b> | <b>0.13017</b> | <b>17.33096</b> | <b>&lt;0.001</b> |
| <b>paternal disorder</b>          | <b>6.95512</b> | <b>5.02122</b> | <b>9.63386</b>  | <b>▲</b> | <b>0.16623</b> | <b>11.66741</b> | <b>&lt;0.001</b> |
| paternal age                      | 1.41375        | 0.52317        | 3.82034         | .        | 0.50720        | 0.68266         | 0.495            |
| maternal age                      | 1.95190        | 0.61484        | 6.19664         | .        | 0.58940        | 1.13472         | 0.256            |
| preexisting hypertension          | 0.67096        | 0.09402        | 4.78799         | .        | 1.00265        | -0.39799        | 0.691            |
| preexisting diabetes              | 0.91936        | 0.29492        | 2.86591         | .        | 0.58010        | -0.14494        | 0.885            |
| <b>previous abortion (induc.)</b> | <b>1.33797</b> | <b>1.16167</b> | <b>1.54104</b>  | <b>▲</b> | <b>0.07209</b> | <b>4.03864</b>  | <b>&lt;0.001</b> |
| previous abortion (spont.)        | 1.07572        | 0.91493        | 1.26478         | .        | 0.08261        | 0.88362         | 0.377            |
| <b>education level</b>            | <b>1.08828</b> | <b>1.04263</b> | <b>1.13592</b>  | <b>▲</b> | <b>0.02186</b> | <b>3.86969</b>  | <b>&lt;0.001</b> |
| <b>average income</b>             | <b>0.90615</b> | <b>0.88399</b> | <b>0.92886</b>  | <b>▼</b> | <b>0.01263</b> | <b>-7.80376</b> | <b>&lt;0.001</b> |
| gestation length                  | 1.00413        | 0.96697        | 1.04272         | .        | 0.01924        | 0.21417         | 0.830            |
| maternal bleeding                 | 0.97058        | 0.76951        | 1.22418         | .        | 0.11844        | -0.25214        | 0.801            |
| fetal oxygen deprivation          | 0.56987        | 0.14205        | 2.28617         | .        | 0.70880        | -0.79338        | 0.428            |
| pregnancy oedema                  | 0.68034        | 0.39300        | 1.17777         | .        | 0.28000        | -1.37559        | 0.169            |
| gestational diabetes              | -              | -              | -               | -        | -              | -               | -                |
| gestational hypertension          | 1.04456        | 0.78914        | 1.38266         | .        | 0.14307        | 0.30473         | 0.761            |
| <b>APGAR5 score</b>               | <b>0.84023</b> | <b>0.71043</b> | <b>0.99375</b>  | <b>▼</b> | <b>0.08562</b> | <b>-2.03317</b> | <b>0.042</b>     |
| <b>sex</b>                        | <b>1.73305</b> | <b>1.53561</b> | <b>1.95587</b>  | <b>▲</b> | <b>0.06171</b> | <b>8.91059</b>  | <b>&lt;0.001</b> |
| <b>birth year cohort</b>          | <b>1.33917</b> | <b>1.25675</b> | <b>1.42699</b>  | <b>▲</b> | <b>0.03241</b> | <b>9.01136</b>  | <b>&lt;0.001</b> |
| <b>birth season</b>               | <b>1.01753</b> | <b>1.00007</b> | <b>1.03530</b>  | <b>▲</b> | <b>0.00883</b> | <b>1.96753</b>  | <b>0.049</b>     |
| country                           | 0.82513        | 0.57962        | 1.17465         | .        | 0.18020        | -1.06667        | 0.286            |
| <b>parity(2nd)</b>                | <b>0.80834</b> | <b>0.70375</b> | <b>0.92847</b>  | <b>▼</b> | <b>0.07069</b> | <b>-3.00983</b> | <b>0.003</b>     |
| parity(3rd)                       | 0.86105        | 0.70271        | 1.05506         | .        | 0.10368        | -1.44301        | 0.149            |
| parity(4+)                        | 0.80678        | 0.58087        | 1.12057         | .        | 0.16762        | -1.28085        | 0.200            |
| <b>region Sjælland</b>            | <b>0.80625</b> | <b>0.65123</b> | <b>0.99819</b>  | <b>▼</b> | <b>0.10895</b> | <b>-1.97662</b> | <b>0.048</b>     |
| region Syddanmark                 | 1.09694        | 0.92370        | 1.30267         | .        | 0.08770        | 1.05500         | 0.291            |
| <b>region Midtjylland</b>         | <b>1.44296</b> | <b>1.23054</b> | <b>1.69206</b>  | <b>▲</b> | <b>0.08125</b> | <b>4.51324</b>  | <b>&lt;0.001</b> |
| region Nordjylland                | 0.81065        | 0.64255        | 1.02273         | .        | 0.11857        | -1.77043        | 0.077            |

Supplementary Material – Figures and Tables

**Table S14.** Risk of major depression by birth weight (a) and length (b).

| major depression (unipolar disorder) [DF32, DF33] |           |         |         |      |         |           |        |
|---------------------------------------------------|-----------|---------|---------|------|---------|-----------|--------|
| (a) birth weight (BW)                             |           |         |         |      |         |           |        |
|                                                   | exp(coef) | LCL     | UCL     | risk | SE      | Z         | Pr(Z)  |
| BW group 1                                        | 1.24140   | 1.11183 | 1.38607 | ▲    | 0.05624 | 3.84473   | <0.001 |
| BW group 2                                        | 1.18200   | 1.12177 | 1.24546 | ▲    | 0.02668 | 6.26612   | <0.001 |
| BW group 3                                        | 1.08876   | 1.04851 | 1.13055 | ▲    | 0.01922 | 4.42474   | <0.001 |
| BW group 4                                        | 0.93069   | 0.89106 | 0.97209 | ▼    | 0.02220 | -3.23485  | 0.001  |
| BW group 5                                        | 0.93270   | 0.87047 | 0.99938 | ▼    | 0.03523 | -1.97769  | 0.048  |
| BW group 6                                        | 0.89322   | 0.77982 | 1.02312 | .    | 0.06928 | -1.62998  | 0.103  |
| maternal disorder                                 | 2.40185   | 2.27245 | 2.53862 | ▲    | 0.02826 | 31.01116  | <0.001 |
| paternal disorder                                 | 2.03765   | 1.90088 | 2.18425 | ▲    | 0.03545 | 20.07990  | <0.001 |
| paternal age                                      | 1.14437   | 0.88898 | 1.47314 | .    | 0.12885 | 1.04664   | 0.295  |
| maternal age                                      | 0.40617   | 0.30122 | 0.54769 | ▼    | 0.15252 | -5.90724  | <0.001 |
| preexisting hypertension                          | 1.32498   | 0.94018 | 1.86727 | .    | 0.17504 | 1.60758   | 0.108  |
| preexisting diabetes                              | 1.04353   | 0.81003 | 1.34434 | .    | 0.12924 | 0.32968   | 0.742  |
| previous abortion (induc.)                        | 1.15117   | 1.10936 | 1.19456 | ▲    | 0.01888 | 7.45825   | <0.001 |
| previous abortion (spont.)                        | 1.07686   | 1.03345 | 1.12209 | ▲    | 0.02099 | 3.52727   | <0.001 |
| education level                                   | 1.00364   | 0.99251 | 1.01489 | .    | 0.00569 | 0.63856   | 0.523  |
| average income                                    | 0.91884   | 0.91289 | 0.92483 | ▼    | 0.00331 | -25.53265 | <0.001 |
| gestation length                                  | 0.99078   | 0.98156 | 1.00009 | .    | 0.00477 | -1.94182  | 0.052  |
| maternal bleeding                                 | 1.18535   | 1.12290 | 1.25128 | ▲    | 0.02762 | 6.15726   | <0.001 |
| fetal oxygen deprivation                          | 1.03377   | 0.76034 | 1.40552 | .    | 0.15674 | 0.21187   | 0.832  |
| pregnancy oedema                                  | 1.01883   | 0.89774 | 1.15625 | .    | 0.06456 | 0.28896   | 0.773  |
| gestational diabetes                              | -         | -       | -       | -    | -       | -         | -      |
| gestational hypertension                          | 1.06492   | 0.99132 | 1.14398 | .    | 0.03654 | 1.72127   | 0.085  |
| APGAR5 score                                      | 0.95737   | 0.91509 | 1.00161 | .    | 0.02305 | -1.89035  | 0.059  |
| sex                                               | 2.42623   | 2.34850 | 2.50652 | ▲    | 0.01661 | 53.35344  | <0.001 |
| birth year cohort                                 | 1.43880   | 1.41802 | 1.45988 | ▲    | 0.00742 | 49.01064  | <0.001 |
| birth season                                      | 1.01209   | 1.00761 | 1.01659 | ▲    | 0.00226 | 5.30852   | <0.001 |
| country                                           | 0.35150   | 0.31501 | 0.39221 | ▼    | 0.05592 | -18.69807 | <0.001 |
| parity(2nd)                                       | 1.06857   | 1.03116 | 1.10732 | ▲    | 0.01818 | 3.64808   | <0.001 |
| parity(3rd)                                       | 1.15674   | 1.09753 | 1.21915 | ▲    | 0.02681 | 5.43109   | <0.001 |
| parity(4+)                                        | 1.21797   | 1.12188 | 1.32229 | ▲    | 0.04193 | 4.70281   | <0.001 |
| region Sjælland                                   | 0.79526   | 0.75602 | 0.83652 | ▼    | 0.02581 | -8.87525  | <0.001 |
| region Syddanmark                                 | 0.95226   | 0.91295 | 0.99325 | ▼    | 0.02151 | -2.27486  | 0.023  |
| region Midtjylland                                | 1.03570   | 0.99400 | 1.07914 | .    | 0.02096 | 1.67309   | 0.094  |
| region Nordjylland                                | 0.58311   | 0.54812 | 0.62034 | ▼    | 0.03158 | -17.08192 | <0.001 |

(b) birth length (BL)

|            | exp(coef) | LCL     | UCL     | risk | SE      | Z        | Pr(Z)  |
|------------|-----------|---------|---------|------|---------|----------|--------|
| BL group 1 | 1.34102   | 1.24138 | 1.44865 | ▲    | 0.03939 | 7.44950  | <0.001 |
| BL group 2 | 1.22649   | 1.16459 | 1.29169 | ▲    | 0.02642 | 7.72611  | <0.001 |
| BL group 3 | 1.13141   | 1.08903 | 1.17544 | ▲    | 0.01948 | 6.33871  | <0.001 |
| BL group 4 | 0.92525   | 0.88159 | 0.97107 | ▼    | 0.02466 | -3.15020 | 0.002  |
| BL group 5 | 0.84852   | 0.79569 | 0.90485 | ▼    | 0.03280 | -5.00879 | <0.001 |

*Supplementary Material – Figures and Tables*

|                                   |                |                |                |   |                |                  |                  |
|-----------------------------------|----------------|----------------|----------------|---|----------------|------------------|------------------|
| <b>BL group 6</b>                 | <b>0.79926</b> | <b>0.70839</b> | <b>0.90178</b> | ∇ | <b>0.06158</b> | <b>-3.63894</b>  | <b>&lt;0.001</b> |
| <b>maternal disorder</b>          | <b>2.41179</b> | <b>2.28111</b> | <b>2.54995</b> | ∧ | <b>0.02842</b> | <b>30.97498</b>  | <b>&lt;0.001</b> |
| <b>paternal disorder</b>          | <b>2.03294</b> | <b>1.89555</b> | <b>2.18028</b> | ∧ | <b>0.03570</b> | <b>19.87298</b>  | <b>&lt;0.001</b> |
| paternal age                      | 1.17331        | 0.90998        | 1.51285        | . | 0.12968        | 1.23250          | 0.218            |
| <b>maternal age</b>               | <b>0.39404</b> | <b>0.29160</b> | <b>0.53247</b> | ∇ | <b>0.15361</b> | <b>-6.06279</b>  | <b>&lt;0.001</b> |
| preexisting hypertension          | 1.33347        | 0.94124        | 1.88916        | . | 0.17773        | 1.61922          | 0.105            |
| preexisting diabetes              | 1.02347        | 0.78638        | 1.33205        | . | 0.13445        | 0.17255          | 0.863            |
| <b>previous abortion (induc.)</b> | <b>1.15357</b> | <b>1.11142</b> | <b>1.19732</b> | ∧ | <b>0.01899</b> | <b>7.52203</b>   | <b>&lt;0.001</b> |
| <b>previous abortion (spont.)</b> | <b>1.07869</b> | <b>1.03492</b> | <b>1.12431</b> | ∧ | <b>0.02113</b> | <b>3.58429</b>   | <b>&lt;0.001</b> |
| education level                   | 1.00440        | 0.99319        | 1.01573        | . | 0.00573        | 0.76633          | 0.443            |
| <b>average income</b>             | <b>0.91899</b> | <b>0.91300</b> | <b>0.92502</b> | ∇ | <b>0.00334</b> | <b>-25.31536</b> | <b>&lt;0.001</b> |
| gestation length                  | 0.99232        | 0.98282        | 1.00190        | . | 0.00491        | -1.57227         | 0.116            |
| <b>maternal bleeding</b>          | <b>1.19070</b> | <b>1.12742</b> | <b>1.25753</b> | ∧ | <b>0.02786</b> | <b>6.26473</b>   | <b>&lt;0.001</b> |
| fetal oxygen deprivation          | 1.05468        | 0.77572        | 1.43396        | . | 0.15674        | 0.33965          | 0.734            |
| pregnancy oedema                  | 1.01999        | 0.89810        | 1.15843        | . | 0.06493        | 0.30486          | 0.760            |
| gestational diabetes              | -              | -              | -              | - | -              | -                | -                |
| gestational hypertension          | 1.06645        | 0.99189        | 1.14662        | . | 0.03698        | 1.73968          | 0.082            |
| APGAR5 score                      | 0.96333        | 0.91869        | 1.01013        | . | 0.02421        | -1.54340         | 0.123            |
| <b>sex</b>                        | <b>2.40929</b> | <b>2.33104</b> | <b>2.49017</b> | ∧ | <b>0.01685</b> | <b>52.19839</b>  | <b>&lt;0.001</b> |
| <b>birth year cohort</b>          | <b>1.43907</b> | <b>1.41818</b> | <b>1.46027</b> | ∧ | <b>0.00746</b> | <b>48.79090</b>  | <b>&lt;0.001</b> |
| <b>birth season</b>               | <b>1.01221</b> | <b>1.00770</b> | <b>1.01674</b> | ∧ | <b>0.00228</b> | <b>5.32642</b>   | <b>&lt;0.001</b> |
| <b>country</b>                    | <b>0.35236</b> | <b>0.31553</b> | <b>0.39349</b> | ∇ | <b>0.05633</b> | <b>-18.51790</b> | <b>&lt;0.001</b> |
| <b>parity(2nd)</b>                | <b>1.06932</b> | <b>1.03179</b> | <b>1.10822</b> | ∧ | <b>0.01823</b> | <b>3.67632</b>   | <b>&lt;0.001</b> |
| <b>parity(3rd)</b>                | <b>1.15750</b> | <b>1.09801</b> | <b>1.22021</b> | ∧ | <b>0.02692</b> | <b>5.43351</b>   | <b>&lt;0.001</b> |
| <b>parity(4+)</b>                 | <b>1.21766</b> | <b>1.12095</b> | <b>1.32272</b> | ∧ | <b>0.04222</b> | <b>4.66419</b>   | <b>&lt;0.001</b> |
| <b>region Sjælland</b>            | <b>0.79851</b> | <b>0.75879</b> | <b>0.84030</b> | ∇ | <b>0.02603</b> | <b>-8.64404</b>  | <b>&lt;0.001</b> |
| region Syddanmark                 | 0.95896        | 0.91900        | 1.00065        | . | 0.02171        | -1.93014         | 0.054            |
| region Midtjylland                | 1.04227        | 0.99999        | 1.08635        | . | 0.02113        | 1.95931          | 0.050            |
| <b>region Nordjylland</b>         | <b>0.58539</b> | <b>0.55005</b> | <b>0.62300</b> | ∇ | <b>0.03177</b> | <b>-16.85436</b> | <b>&lt;0.001</b> |
